# Supplementary material for: New Carboxamides and a New Polyketide from the Sponge-Derived Fungus Arthrinium sp. SCSIO 41421
Source: MDPI journal article supplement (doi:10.3390/md20080475), 2022-07-25
Supplement: s1 [file s1]

# New carboxamides and a new polyketide from the sponge-derived fungus *Arthrinium* sp. SCSIO 41421

Jianglian She <sup>1,2,3</sup>, Yi Chen <sup>1,2</sup>, Yuxiu Ye <sup>4</sup>, Xiuping Lin <sup>1</sup>, Bin Yang <sup>1</sup>, Jiao Xiao <sup>5</sup>, Yonghong Liu <sup>1,2,3</sup>, Xuefeng Zhou <sup>1,2,3\*</sup>

<sup>1</sup> CAS Key Laboratory of Tropical Marine Bio-resources and Ecology, Guangdong Key Laboratory of Marine Materia Medica, South China Sea Institute of Oceanology, Chinese Academy of Sciences, Guangzhou 510301, China; shejianglian20@mailsucas.ac.cn (J. S.); 13620281931@163.com (Y. C.); xiupinglin@scsio.ac.cn (X. L.); yangbin@scsio.ac.cn (B. Y.); yonghongliu@scsio.ac.cn (Y. L.)

<sup>2</sup> University of Chinese Academy of Sciences, Beijing 100049, China

<sup>3</sup> Southern Marine Science and Engineering Guangdong Laboratory (Guangzhou), Guangzhou 511458, China

<sup>4</sup> Institute of Marine Drugs, Guangxi University of Chinese Medicine, Nanning 530200, China; 18877548173@163.com (Y. Y.)

<sup>5</sup> Wuya College of Innovation, Shenyang Pharmaceutical University, Shenyang 110016, China; xj110121@126.com (J. X.)

\* Correspondence: xfzhou@scsio.ac.cn (X.Z.)

## Contents

The ITS gene sequence data of *Arthrinium* sp. SCSIO 41421.

Figure S1. The  $^1\text{H}$  NMR spectrum of compound 1 in  $\text{DMSO}-d_6$ .

Figure S2. The  $^{13}\text{C}$  NMR spectrum of compound 1 in  $\text{DMSO}-d_6$ .

Figure S3. The HSQC spectrum of compound 1 in  $\text{DMSO}-d_6$ .

Figure S4. The HMBC spectrum of compound 1 in  $\text{DMSO}-d_6$ .

Figure S5. The  $^1\text{H}-^1\text{H}$  COSY spectrum of compound 1 in  $\text{DMSO}-d_6$ .

Figure S6. The NOESY spectrum of compound 1 in  $\text{DMSO}-d_6$ .

Figure S7. The HRESIMS spectrum of compound 1 in  $\text{CH}_3\text{OH}$ .

Figure S8. The UV and CD spectrums of compound 1 in  $\text{CH}_3\text{OH}$ .

Figure S9. The  $^1\text{H}$  NMR spectrum of compound 2 in  $\text{CDCl}_3$ .

Figure S10. The  $^{13}\text{C}$  NMR spectrum of compound 2 in  $\text{CDCl}_3$ .

Figure S11. The HSQC spectrum of compound 2 in  $\text{CDCl}_3$ .

Figure S12. The HMBC spectrum of compound 2 in  $\text{CDCl}_3$ .

Figure S13. The  $^1\text{H}-^1\text{H}$  COSY spectrum of compound 2 in  $\text{CDCl}_3$ .

Figure S14. The NOESY spectrum of compound 2 in  $\text{CDCl}_3$ .

Figure S15. The HRESIMS spectrum of compound 2 in  $\text{CH}_3\text{OH}$ .

Figure S16. The UV spectrum of compound 2 in  $\text{CH}_3\text{OH}$ .

Figure S17. The  $^1\text{H}$  NMR spectrum of compound 3 in  $\text{DMSO}-d_6$ .

Figure S18. The  $^{13}\text{C}$  NMR spectrum of compound 3 in  $\text{DMSO}-d_6$ .

Figure S19. The HSQC spectrum of compound 3 in  $\text{DMSO}-d_6$ .

Figure S20. The HMBC spectrum of compound 3 in  $\text{DMSO}-d_6$ .

Figure S21. The  $^1\text{H}-^1\text{H}$  COSY spectrum of compound 3 in  $\text{DMSO}-d_6$ .

Figure S22. The NOESY spectrum of compound 3 in  $\text{DMSO}-d_6$ .

Figure S23. The HRESIMS spectrum of compound 3 in  $\text{CH}_3\text{OH}$ .

Figure S24. The UV spectrum of compound 3 in  $\text{CH}_3\text{OH}$ .

Figure S25. Linear correlation plots of calculated-experimental  $^{13}\text{C}$  NMR chemical shift values with DP4<sup>+</sup> analyses for potential configurations of compound 2 (Isomer 1: (7R\*, 9R\*)-2, Isomer 2: (7R\*, 9S\*)-2, Isomer 3: (7S\*, 9R\*)-2 and Isomer 4: (7S\*, 9S\*)-2).

Table S1. DP4<sup>+</sup> analysis of experimental and calculated NMR chemical shifts of Isomer 1: (7R\*, 9R\*)-2, Isomer 2: (7R\*, 9S\*)-2, Isomer 3: (7S\*, 9R\*)-2 and Isomer 4: (7S\*, 9S\*)-2.

Figure S26. Linear correlation plots of calculated-experimental  $^{13}\text{C}$  NMR chemical shift values with DP4<sup>+</sup> analyses for potential configurations of compound 2 (Isomer 1: (7R\*, 9R\*)-2 and Isomer 2: (7S\*, 9S\*)-2).

Table S2. DP4<sup>+</sup> analysis of experimental and calculated NMR chemical shifts of Isomer 1: (7R\*, 9R\*)-2 and Isomer 2: (7S\*, 9S\*)-2.

Figure S27. Linear correlation plots of calculated-experimental  $^{13}\text{C}$  NMR chemical shift values with DP4<sup>+</sup> analyses for potential configurations of compound 3.

Table S3. DP4<sup>+</sup> analysis of experimental and calculated NMR chemical shifts of Isomer 1: (4R\*, 4aR\*, 9aR\*)-3, Isomer 2: (4S\*, 4aS\*, 9aR\*)-3, Isomer 3: (4R\*, 4aR\*, 9aS\*)-3, and Isomer 4: (4S\*, 4aS\*, 9aS\*)-3.

The physicochemical data of compounds 1–18.

The ITS gene sequence data of *Arthrinium* sp. SCSIO 41421.

GGGTATTCCTACCTGATCCGAGGTCAACCACTAAAAATTGGGGGTTTTATGGCGGG  
 AGGACAGAGCCTTACAGAAGCGAGAAATAAATTTACTACGCTCAGAGGACAACCTA  
 TCGCTCCGCCACTGTCTTTAAGGAACTACAGTACAGTAGATTCCCAACACTAAGCT  
 AGGCTTAAGGGTTGAAATGACGCTCGAACAGGCATGCCACCAGAATACTGATGG  
 GCGCAATGTGCGTTCAAAGATTCGATGATTCACTGAATTCTGCAATTCACATTACTT  
 ATCGCATTTCGCTGCGTTCTTCATCGATGCCAGAACCAAGAGATCCGTTGTTGAAA  
 GTTTTAATTATTAATAATAACGCTCAGAAGATACAATAAAACAAGAGTTTAGTGTC  
 CACCGGCGGGGCTGCGCGGGAGTGGTGCAGGGTAAGCTACAGGGTAGCCTACAGG  
 GTAGTACCGGGTAACCTACAGGGTAGGCTACAGGGTAGCACCCGACCTGCCTCC  
 GTACGCAGTTCACGCCGAGGCATAACTGGTAAGTTAACAAATGGTGTGG

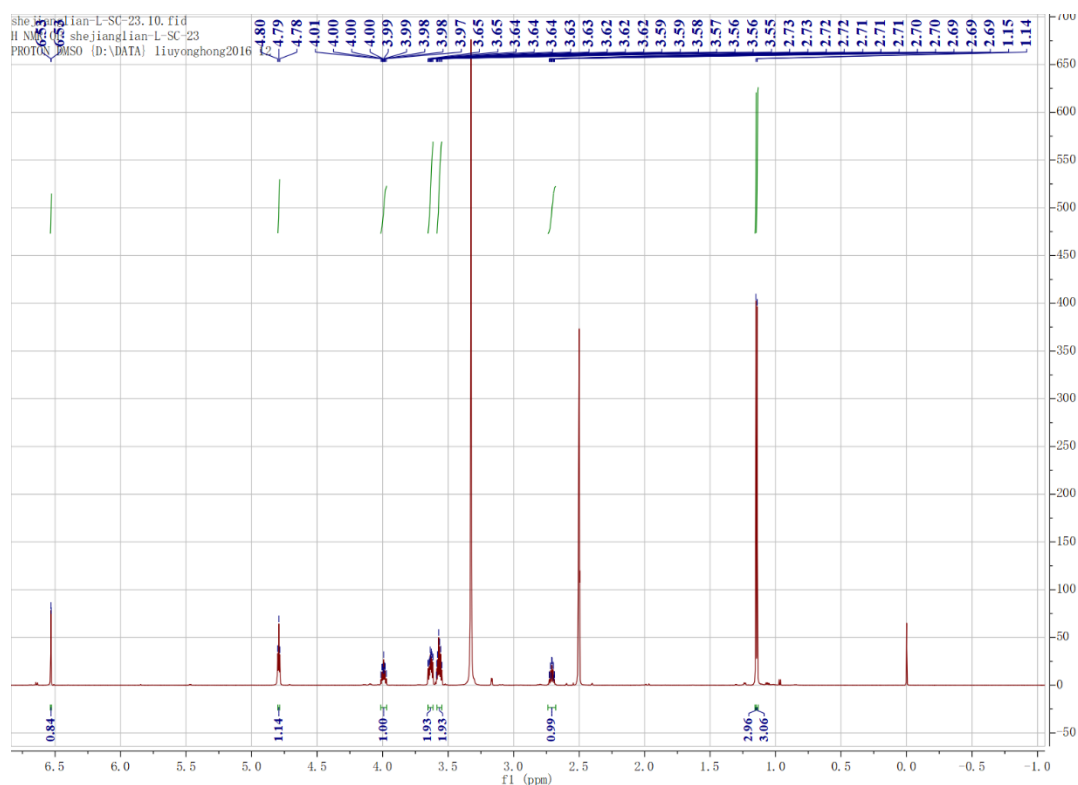

Figure S1. The <sup>1</sup>H NMR spectrum of compound 1 in DMSO-*d*<sub>6</sub>.

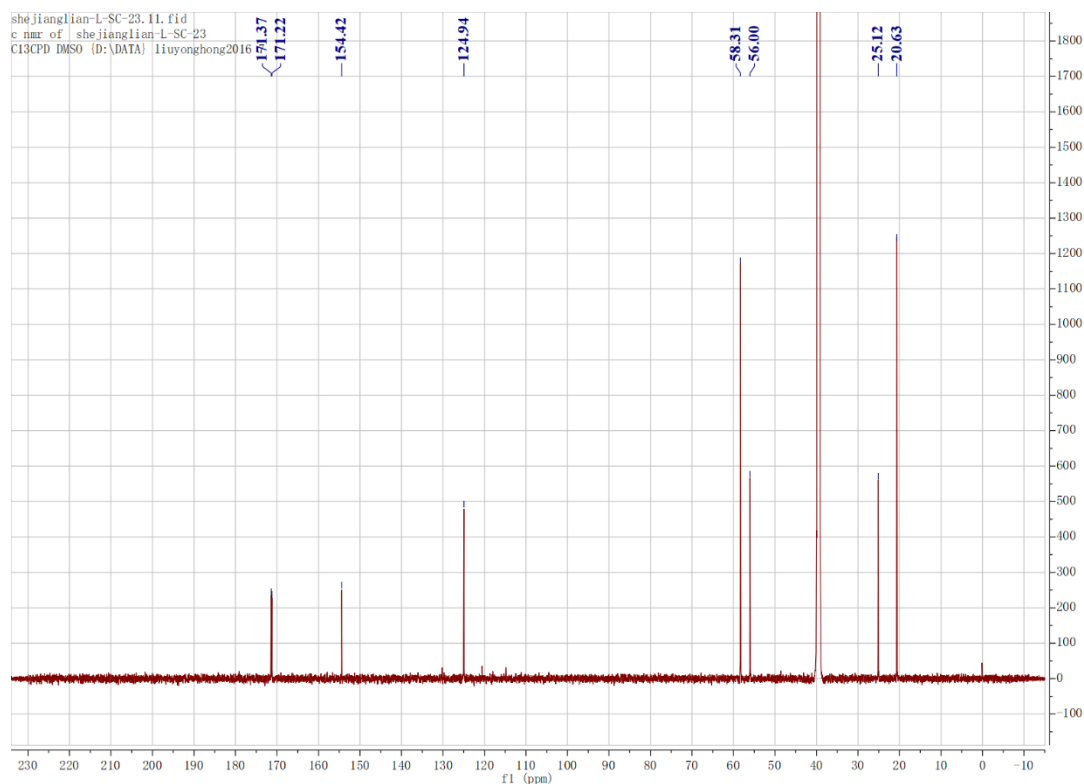

Figure S2. The  $^{13}\text{C}$  NMR spectrum of compound 1 in  $\text{DMSO}-d_6$ .

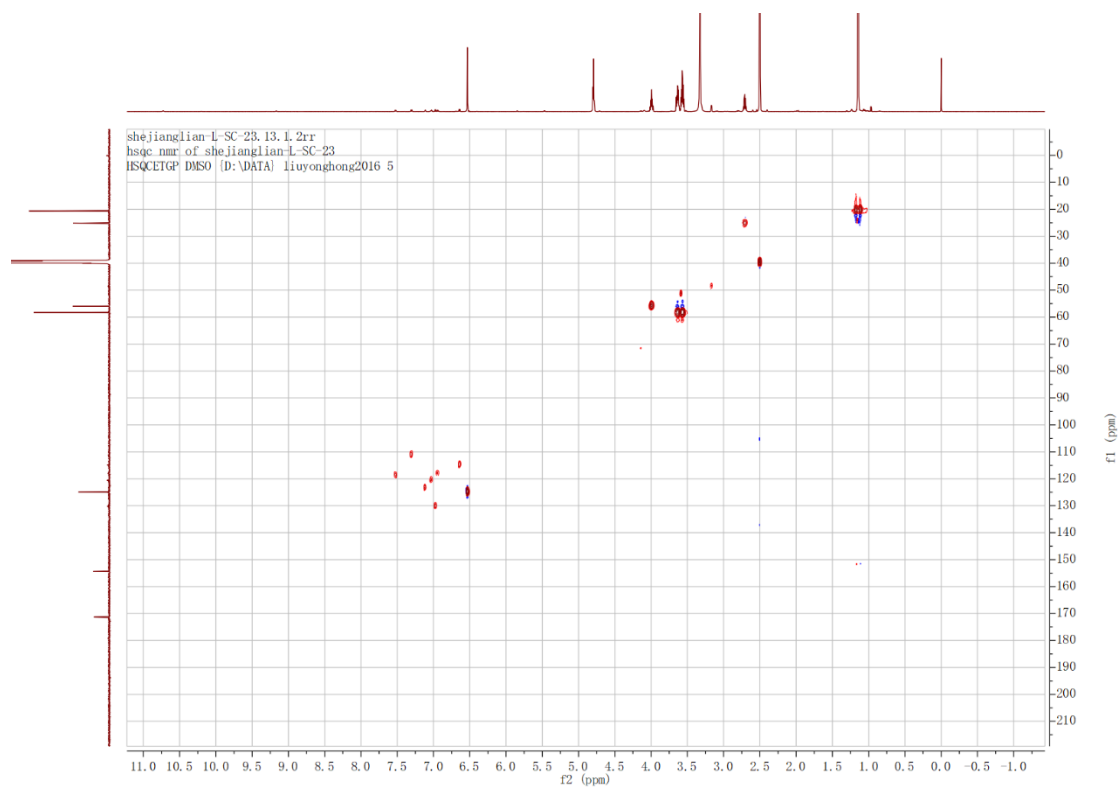

Figure S3. The HSQC spectrum of compound 1 in  $\text{DMSO}-d_6$ .

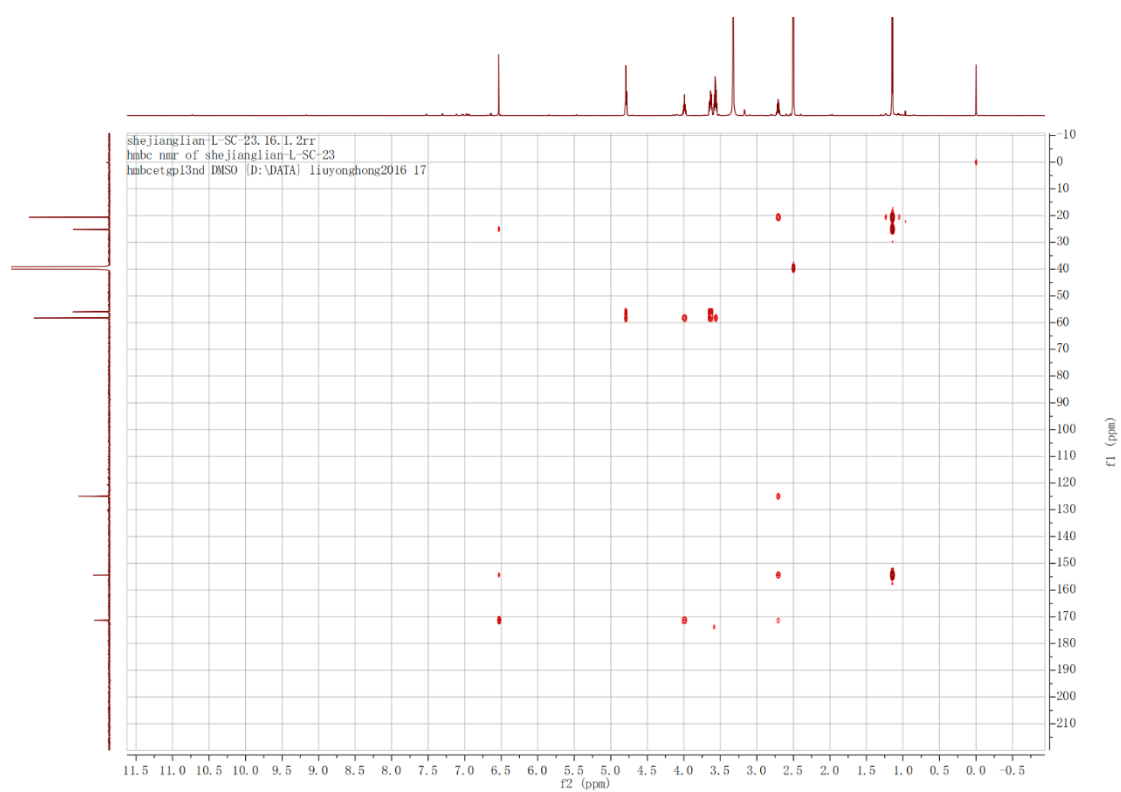

**Figure S4.** The HMBC spectrum of compound **1** in DMSO-*d*<sub>6</sub>.

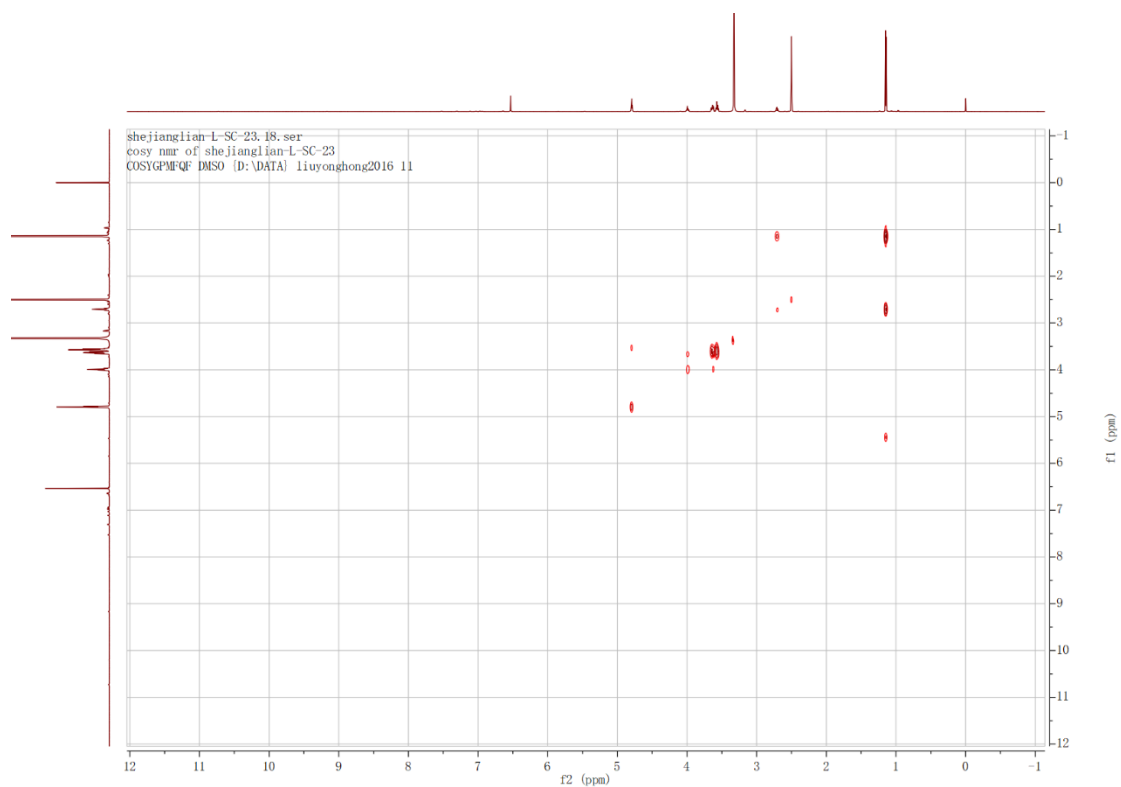

**Figure S5.** The <sup>1</sup>H-<sup>1</sup>H COSY spectrum of compound **1** in DMSO-*d*<sub>6</sub>.

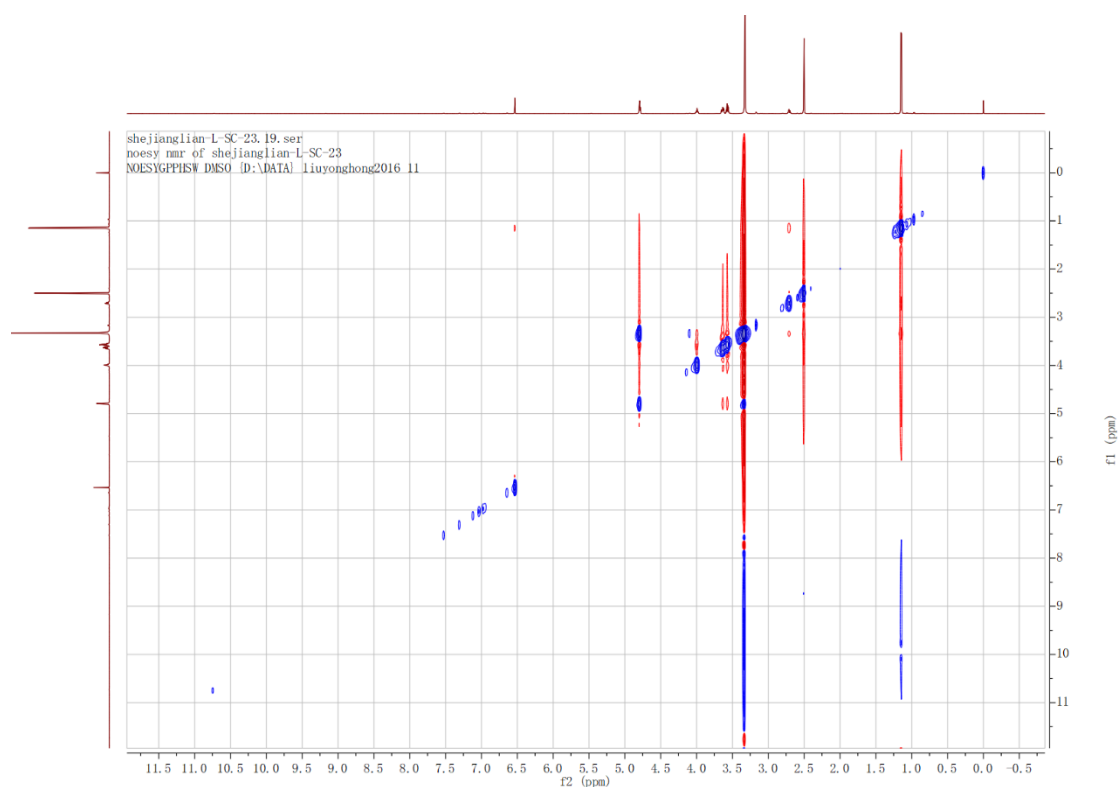

Figure S6. The NOESY spectrum of compound 1 in DMSO- $d_6$ .

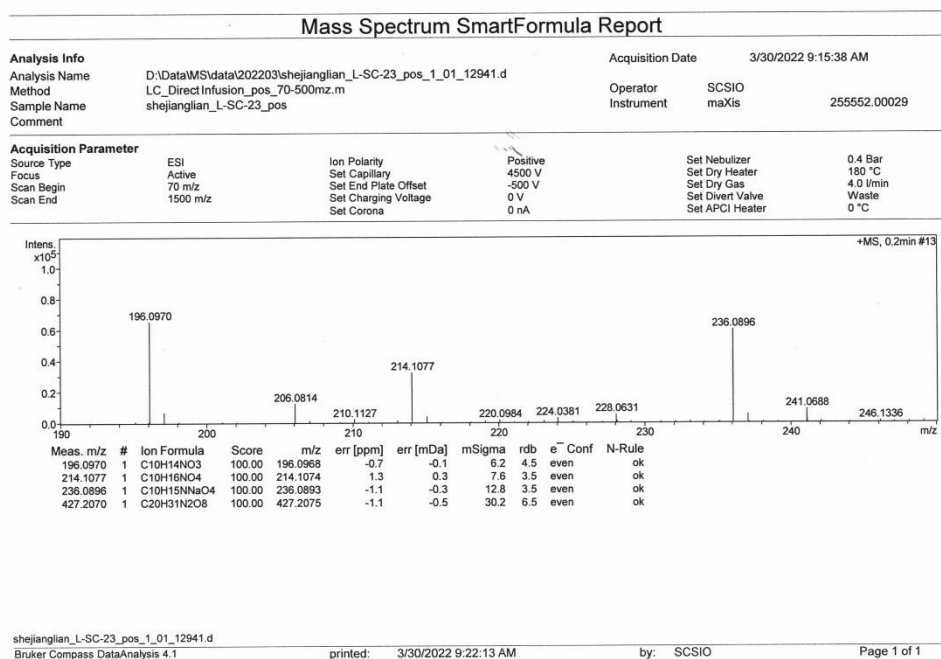

Figure S7. The HRESIMS spectrum of compound 1 in CH<sub>3</sub>OH.

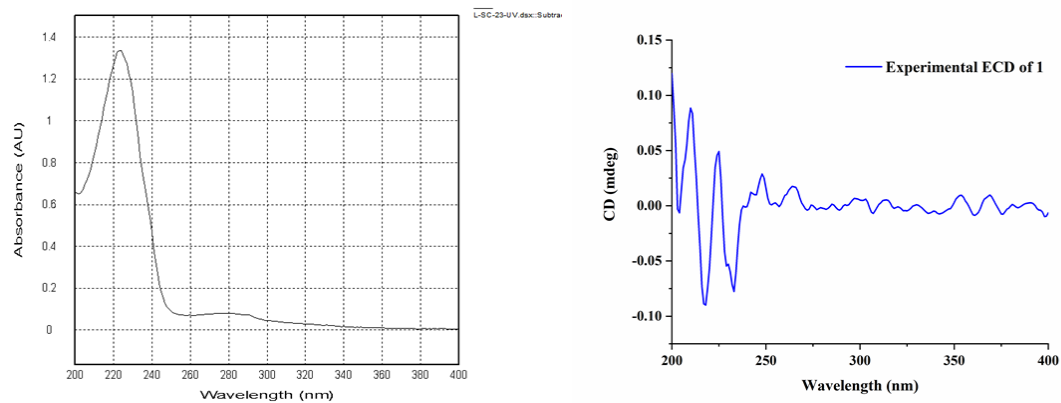

Figure S8. The UV and CD spectrums of compound 1 in CH<sub>3</sub>OH.

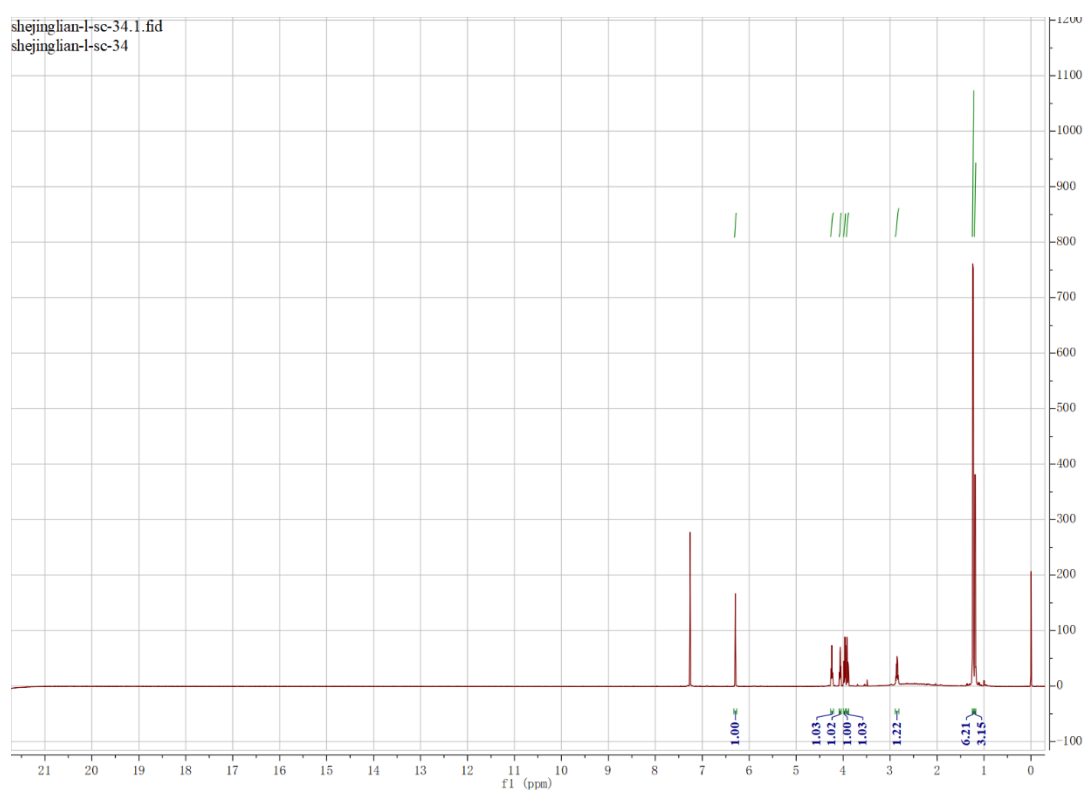

Figure S9. The <sup>1</sup>H NMR spectrum of compound 2 in CDCl<sub>3</sub>.

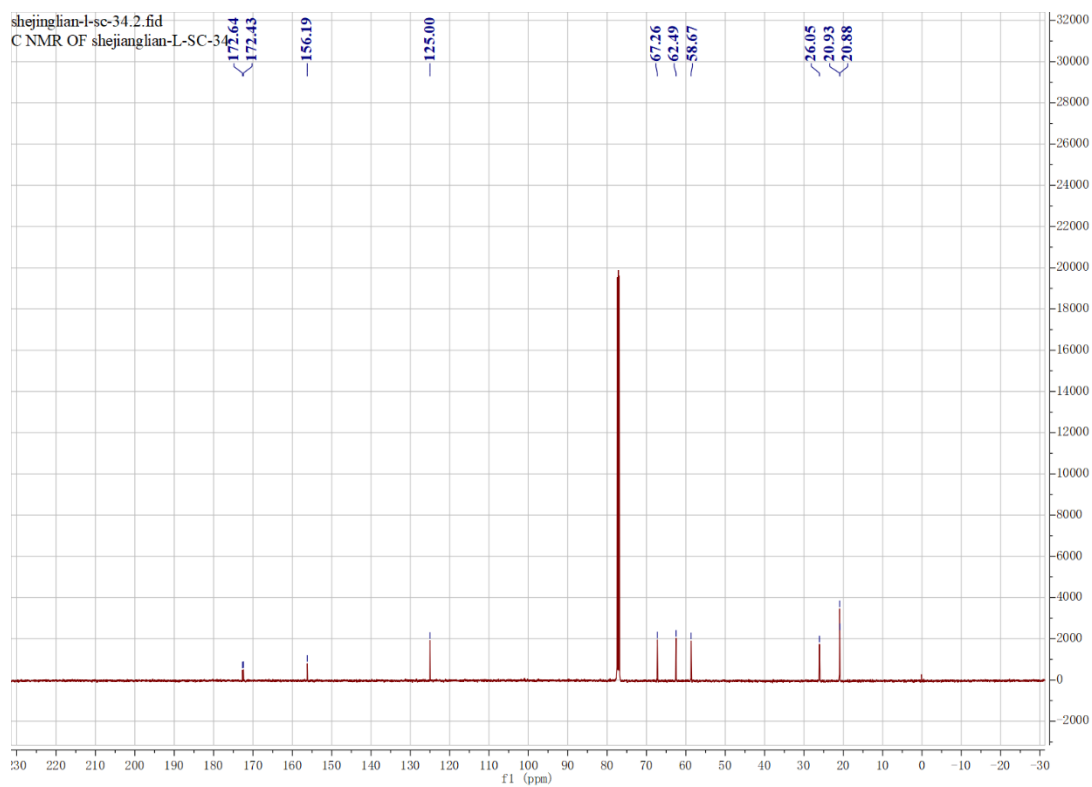

Figure S10. The  $^{13}\text{C}$  NMR spectrum of compound 2 in  $\text{CDCl}_3$ .

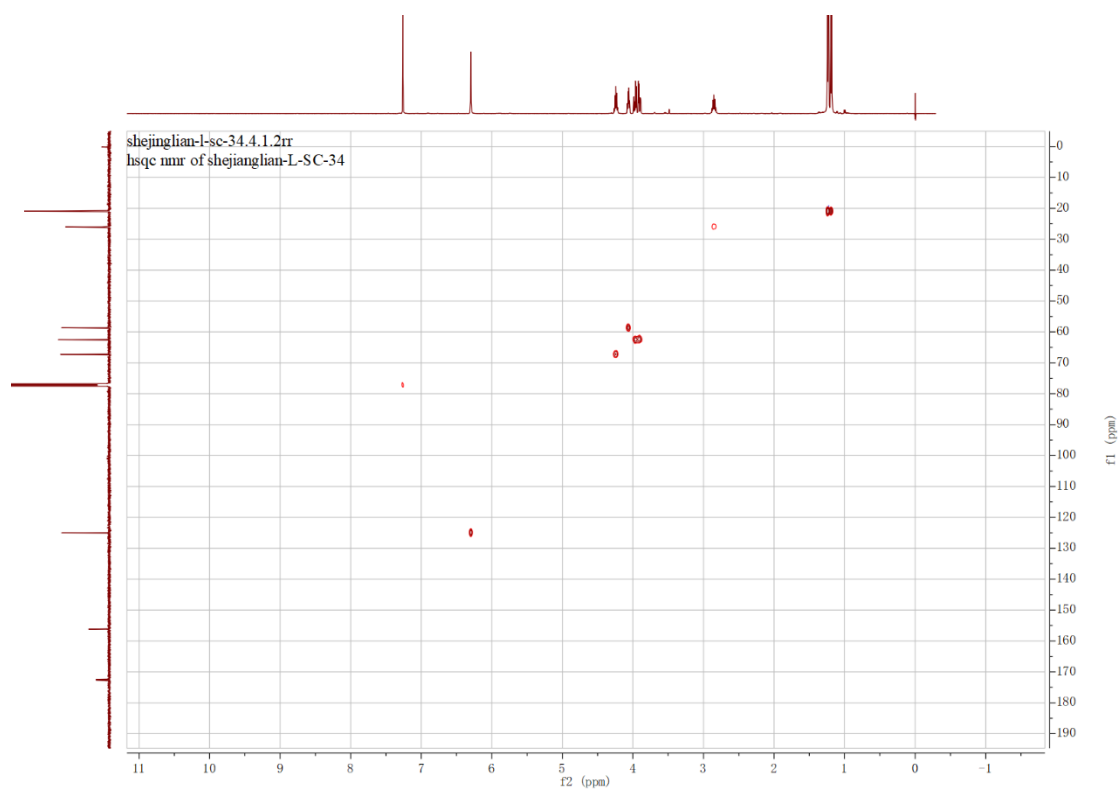

Figure S11. The HSQC spectrum of compound 2 in  $\text{CDCl}_3$ .



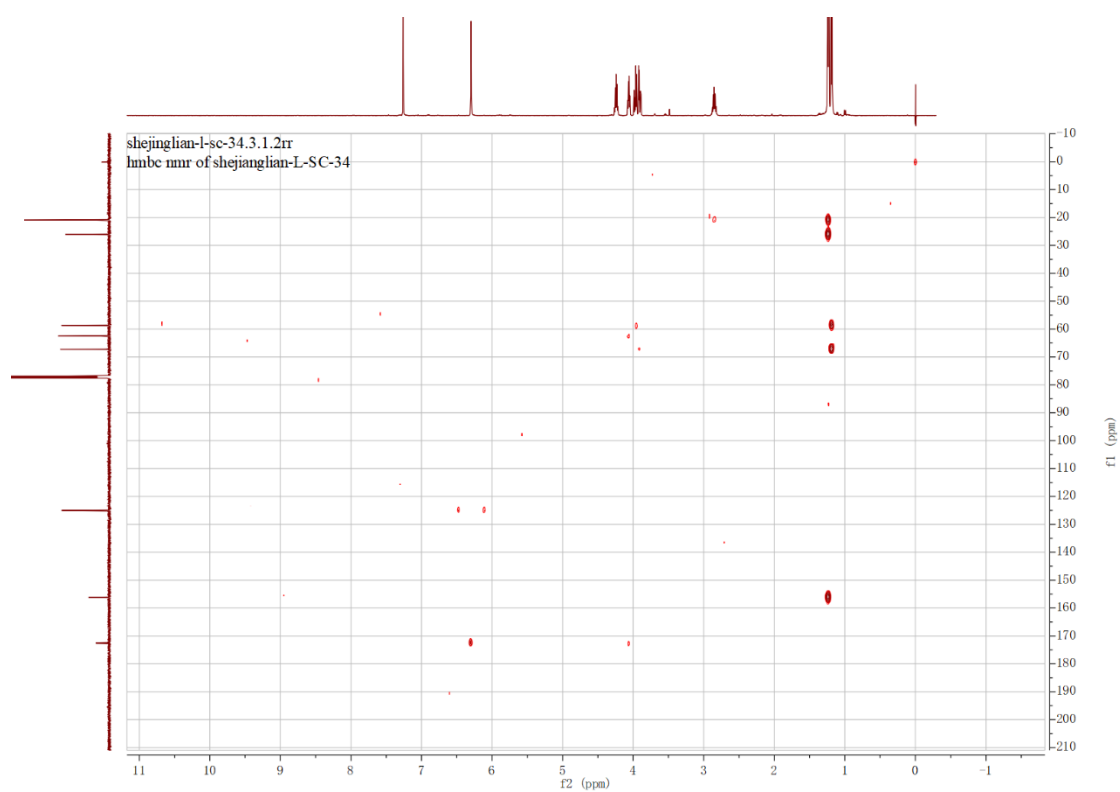

Figure S12. The HMBC spectrum of compound 2 in CDCl<sub>3</sub>.

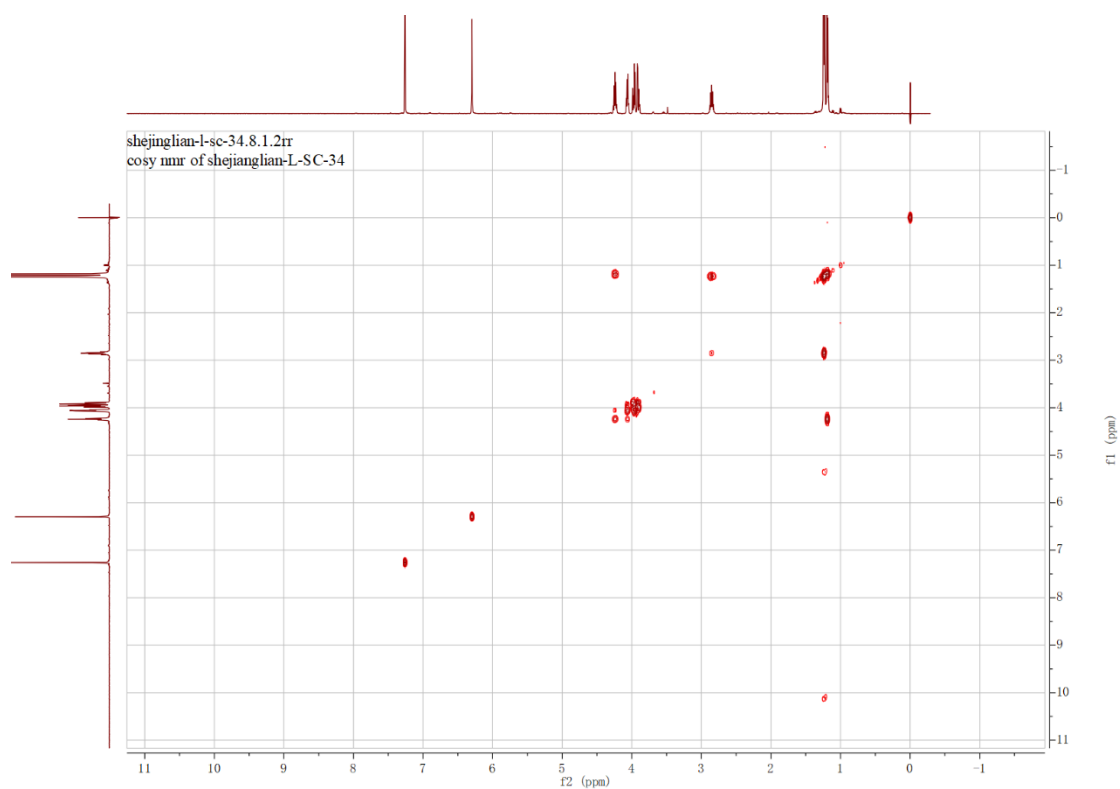

Figure S13. The <sup>1</sup>H-<sup>1</sup>H COSY spectrum of compound 2 in CDCl<sub>3</sub>.

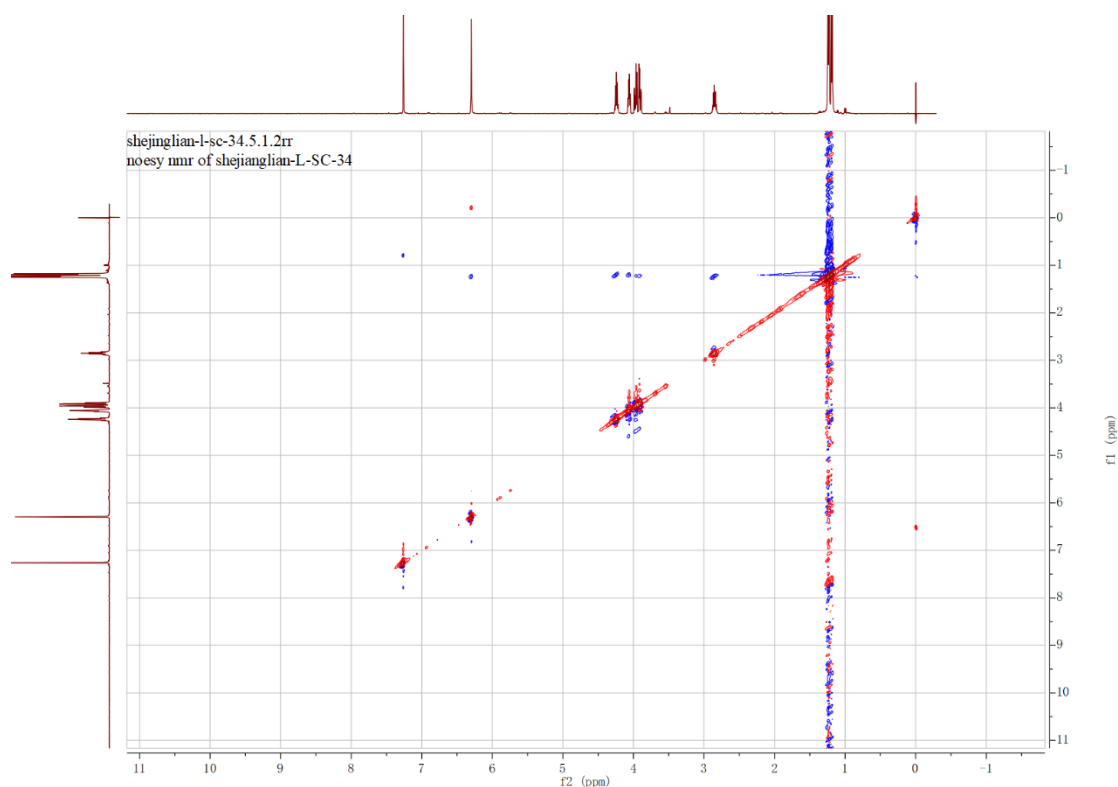

Figure S14. The NOESY spectrum of compound 2 in  $\text{CDCl}_3$ .

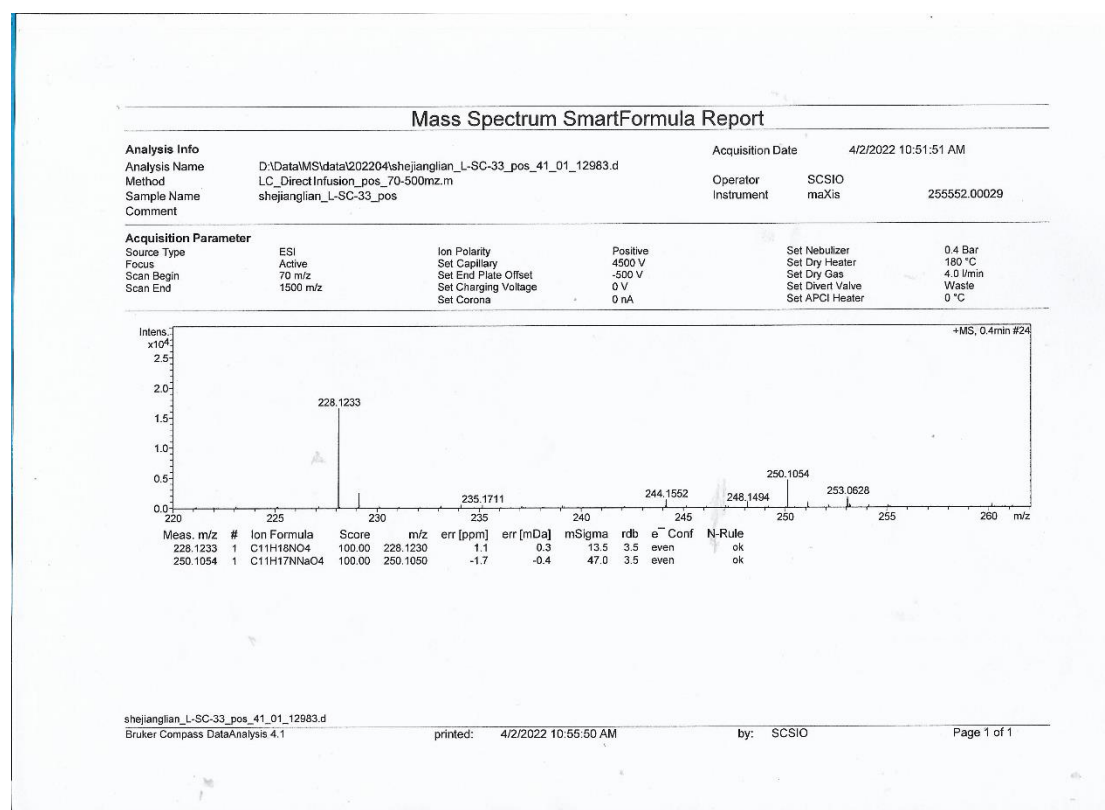

Figure S15. The HRESIMS spectrum of compound 2 in  $\text{CH}_3\text{OH}$ .

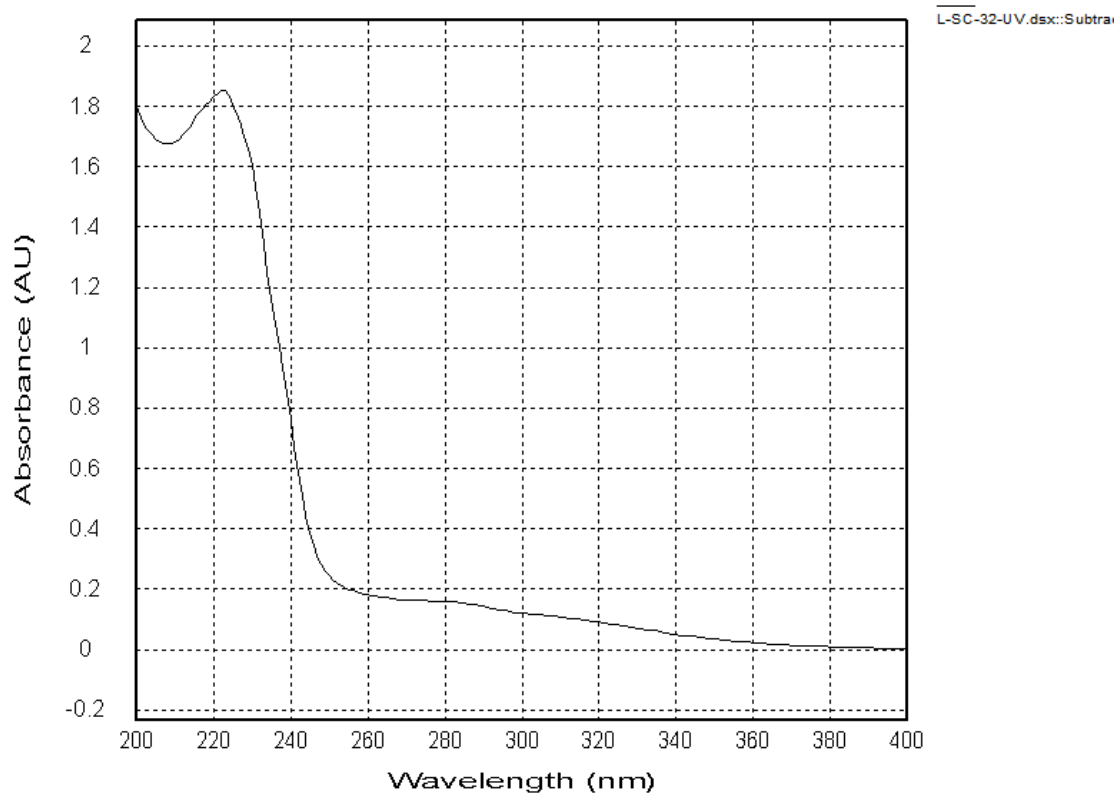

Figure S16. The UV spectrum of compound 2 in CH<sub>3</sub>OH.

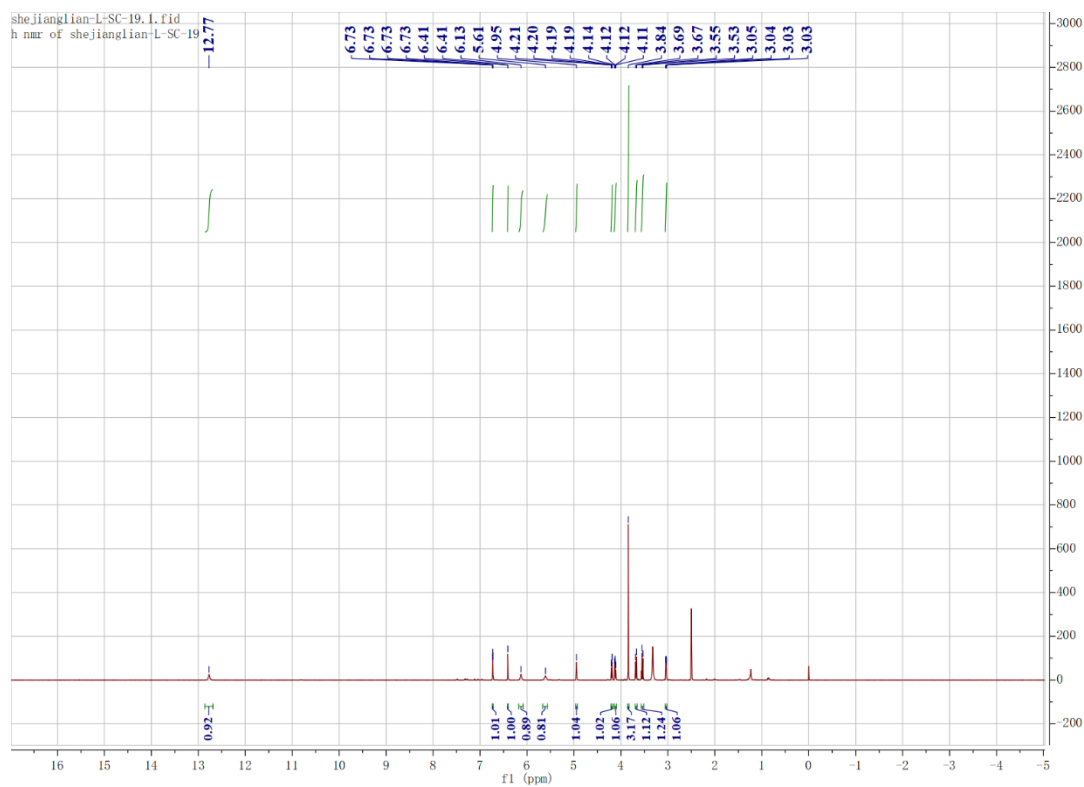

Figure S17. The <sup>1</sup>H NMR spectrum of compound 3 in DMSO-*d*<sub>6</sub>.

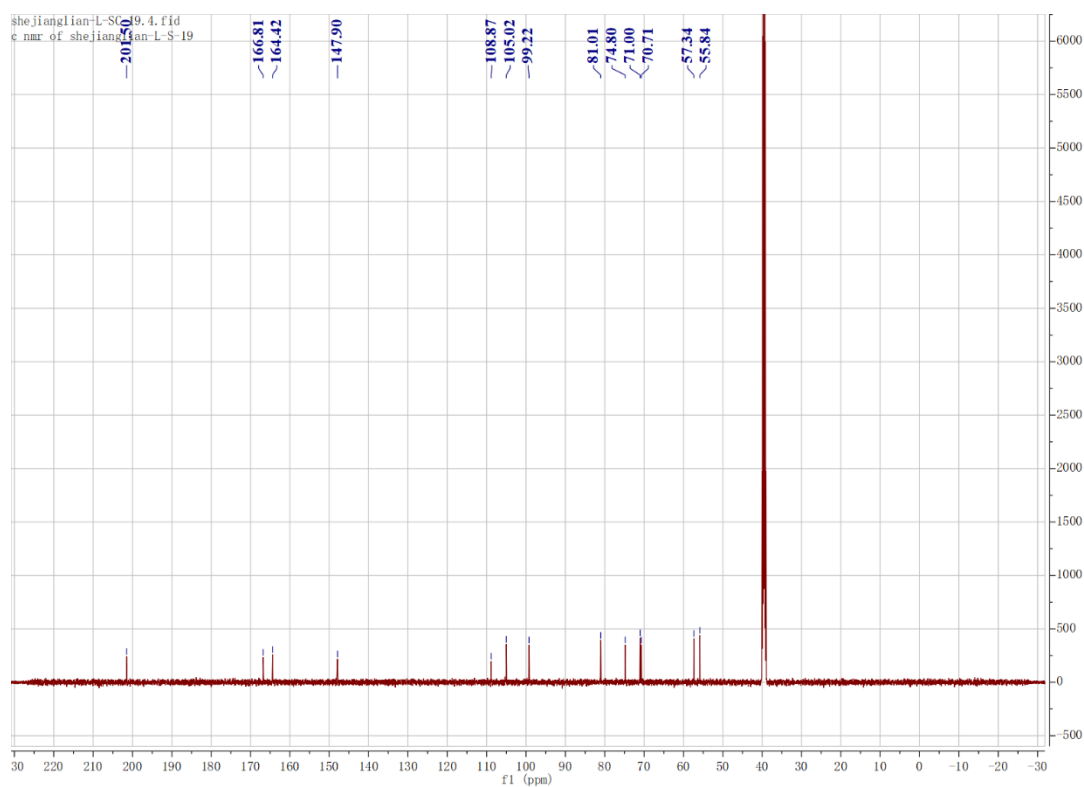

Figure S18. The  $^{13}\text{C}$  NMR spectrum of compound 3 in  $\text{DMSO-}d_6$ .

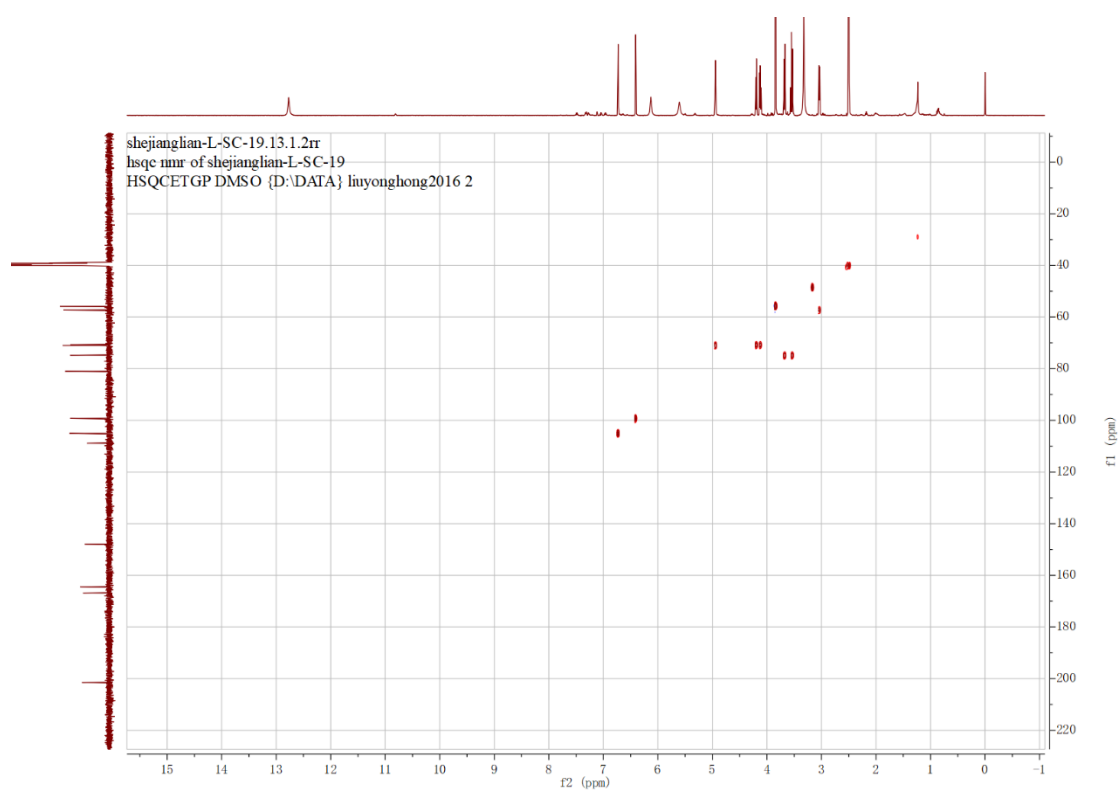

Figure S19. The HSQC spectrum of compound 3 in  $\text{DMSO-}d_6$ .

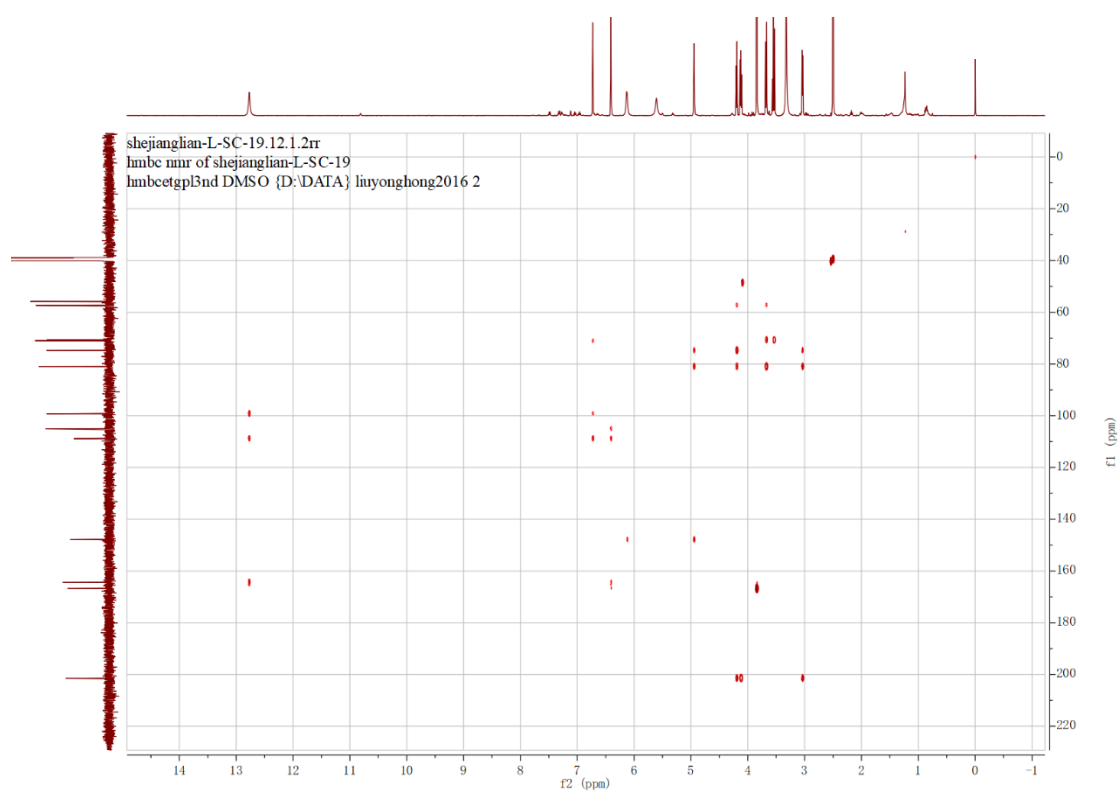

Figure S20. The HMBC spectrum of compound 3 in DMSO-*d*<sub>6</sub>.

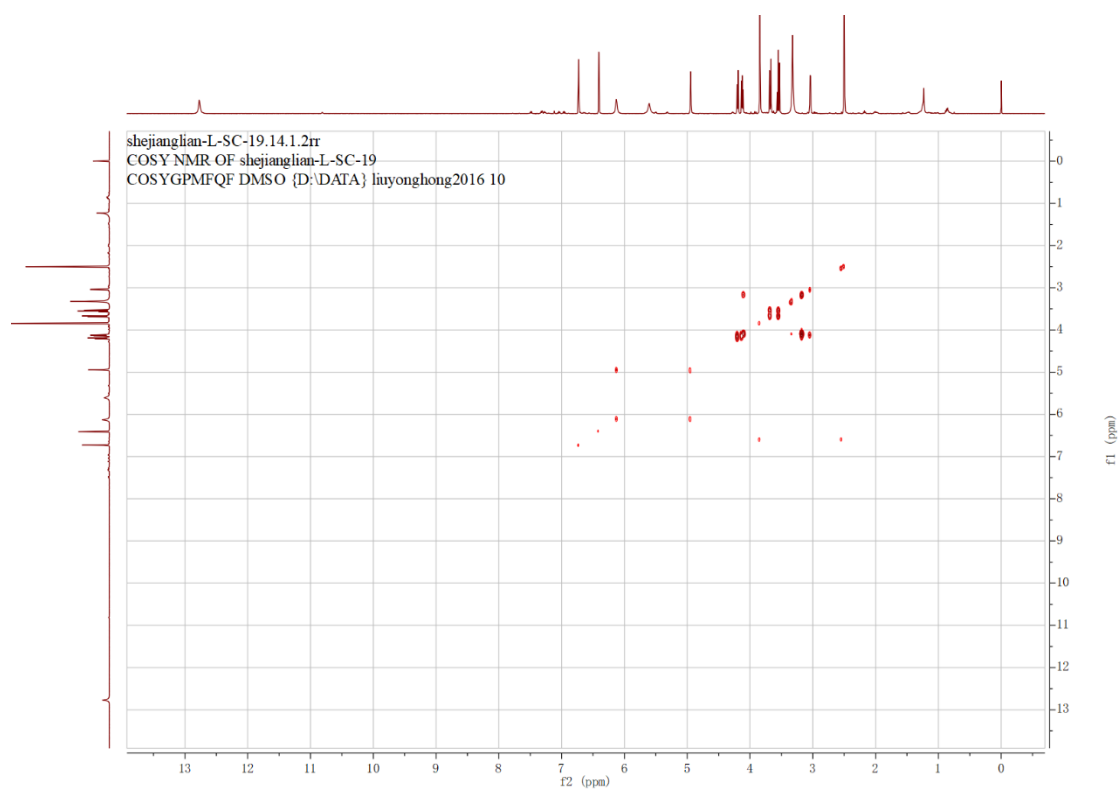

Figure S21. The  $^1\text{H}$ - $^1\text{H}$  COSY spectrum of compound 3 in DMSO-*d*<sub>6</sub>.

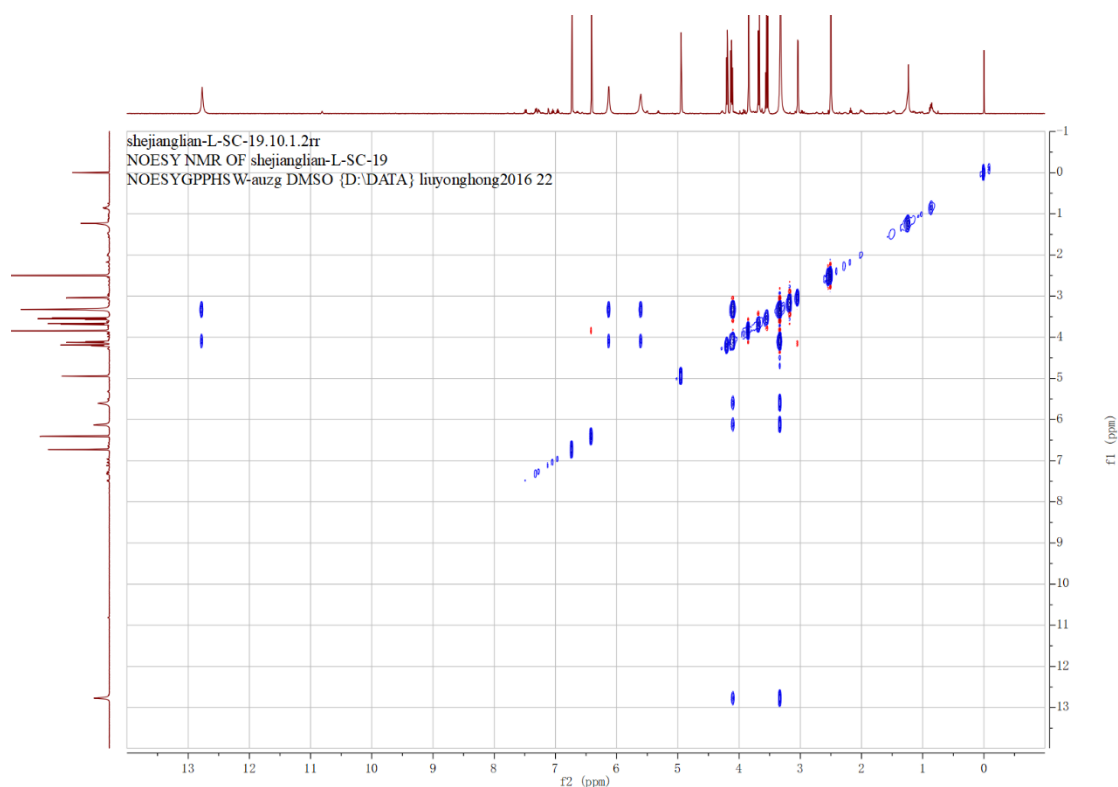

Figure S22. The NOESY spectrum of compound 3 in DMSO- $d_6$ .

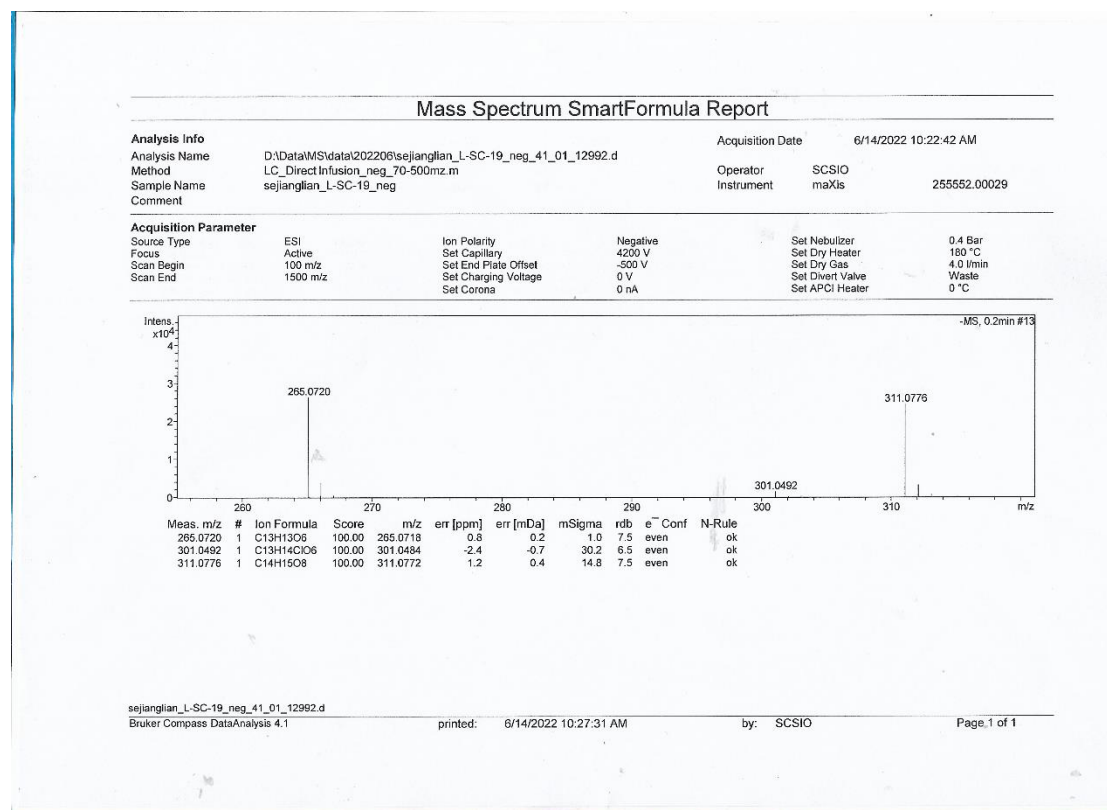

Figure S23. The HRESIMS spectrum of compound 3 in CH<sub>3</sub>OH.

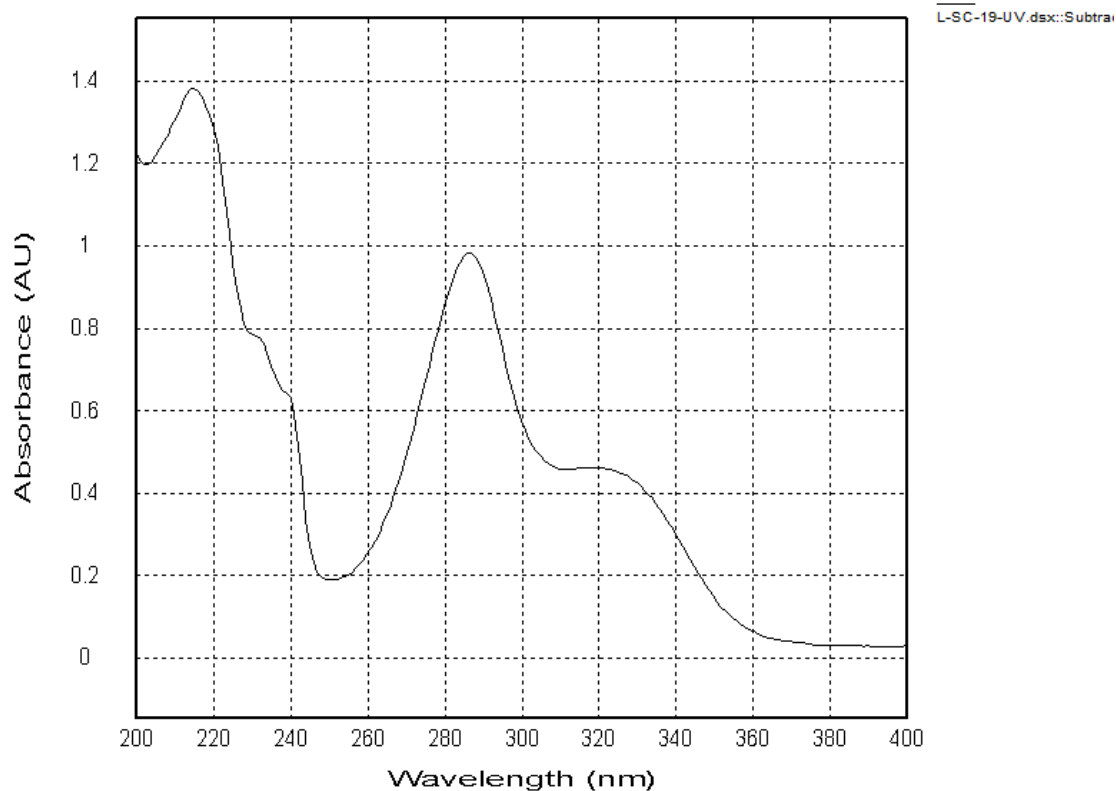

Figure S24. The UV spectrum of compound 3 in DMSO- $d_6$ .

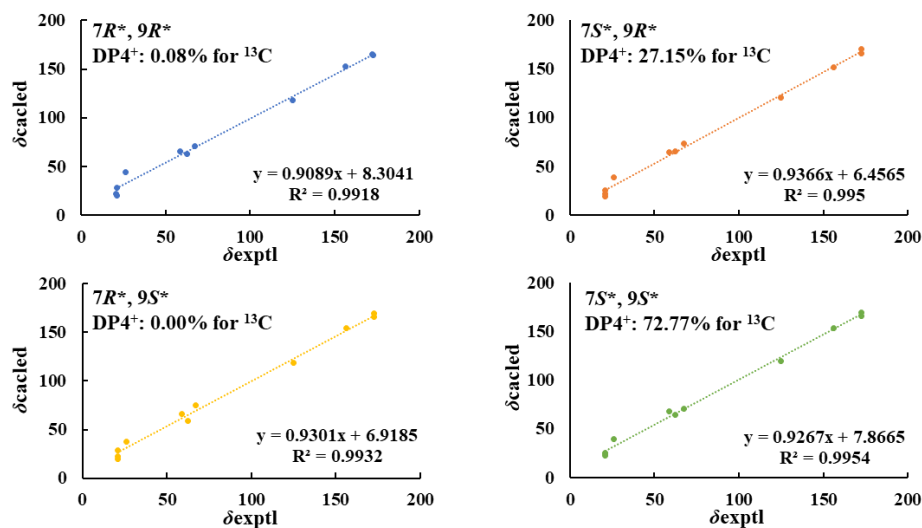

Figure S25. Linear correlation plots of calculated-experimental  $^{13}\text{C}$  NMR chemical shift values with DP4+ analyses for potential configurations of compound 2 (Isomer 1: (7R\*, 9R\*)-2, Isomer 2: (7R\*, 9S\*)-2, Isomer 3: (7S\*, 9R\*)-2 and Isomer 4: (7S\*, 9S\*)-2).

Table S1. DP4<sup>+</sup> analysis of experimental and calculated NMR chemical shifts of Isomer 1: (7*R*\*, 9*R*\*)-2, Isomer 2: (7*R*\*, 9*S*\*)-2, Isomer 3: (7*S*\*, 9*R*\*)-2 and Isomer 4: (7*S*\*, 9*S*\*)-2.

| Functional |      | Solvent?         | Basis Set    |          |          | Type of Data  |          |
|------------|------|------------------|--------------|----------|----------|---------------|----------|
| B3LYP      |      | PCM              | 6-31+G(d, p) |          |          | Scaled Shifts |          |
|            |      | DP4 <sup>+</sup> | –            | –        | –        | –             | –        |
| Nuclei     | sp2? | Experimenta      | Isomer 1     | Isomer 2 | Isomer 3 | Isomer 4      | Isomer 5 |
| C          | x    | 172.64           | 171.8        | 174.8    | 174.3    | 174.7         |          |
| C          | x    | 156.19           | 159.1        | 155.6    | 158.1    | 157.2         |          |
| C          | x    | 125              | 120.5        | 122.0    | 119.7    | 120.9         |          |
| C          | x    | 172.43           | 172.6        | 170.2    | 171.0    | 170.7         |          |
| C          |      | 58.67            | 62.6         | 62.2     | 64.0     | 64.9          |          |
| C          |      | 62.49            | 59.6         | 63.1     | 56.3     | 60.9          |          |
| C          |      | 26.05            | 39.0         | 34.2     | 33.3     | 34.3          |          |
| C          |      | 20.88            | 21.4         | 20.1     | 16.2     | 17.4          |          |
| C          |      | 20.88            | 13.3         | 16.6     | 23.6     | 19.1          |          |
| C          |      | 67.26            | 69.2         | 71.5     | 73.0     | 67.9          |          |
| C          |      | 20.93            | 14.4         | 13.16    | 13.9     | 15.5          |          |

| Functional                   |  | Solvent? | Basis Set    |          |          | Type of Data  |          |
|------------------------------|--|----------|--------------|----------|----------|---------------|----------|
| B3LYP                        |  | PCM      | 6-31+G(d, p) |          |          | Scaled Shifts |          |
|                              |  | Isomer 1 | Isomer 2     | Isomer 3 | Isomer 4 | Isomer 5      | Isomer 6 |
| sDP4 <sup>+</sup> (H data)   |  | –        | –            | –        | –        | –             | –        |
| sDP4 <sup>+</sup> (C data)   |  | 0.08%    | 27.15%       | 0.00%    | 72.77%   | –             | –        |
| sDP4 <sup>+</sup> (all data) |  | 0.08%    | 27.15%       | 0.00%    | 72.77%   | –             | –        |
| uDP4 <sup>+</sup> (H data)   |  | –        | –            | –        | –        | –             | –        |
| uDP4 <sup>+</sup> (C data)   |  | –        | –            | –        | –        | –             | –        |
| uDP4 <sup>+</sup> (all data) |  | –        | –            | –        | –        | –             | –        |
| DP4 <sup>+</sup> (H data)    |  | –        | –            | –        | –        | –             | –        |
| DP4 <sup>+</sup> (C data)    |  | –        | –            | –        | –        | –             | –        |
| DP4 <sup>+</sup> (all data)  |  | –        | –            | –        | –        | –             | –        |

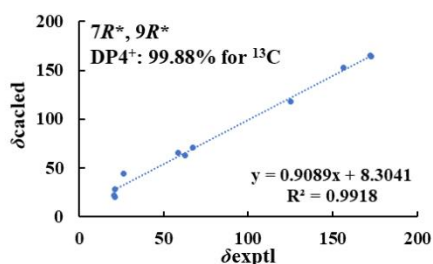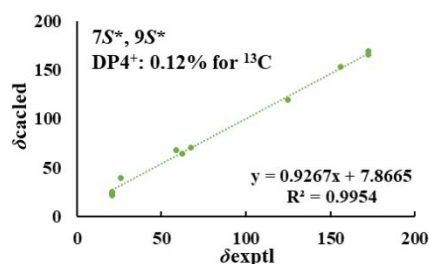

Figure S26. Linear correlation plots of calculated-experimental <sup>13</sup>C NMR chemical shift values with DP4<sup>+</sup> analyses for potential configurations of compound 2 (Isomer 1: (7*R*\*, 9*R*\*)-2 and Isomer 2: (7*S*\*, 9*S*\*)-2).

Table S2. DP4<sup>+</sup> analysis of experimental and calculated NMR chemical shifts of Isomer 1: (7*R*\*, 9*R*\*)-2 and Isomer 2: (7*S*\*, 9*S*\*)-2.



|    | A          | B    | C           | D        | E           | F        | G             | H        |
|----|------------|------|-------------|----------|-------------|----------|---------------|----------|
| 1  | Functional |      | Solvent?    |          | Basis Set   |          | Type of Data  |          |
| 2  | B3LYP      |      | PCM         |          | 6-31+G(d,p) |          | Scaled Shifts |          |
| 3  |            |      |             |          |             |          |               |          |
| 12 |            |      | DP4+        | —        | —           | —        | —             | —        |
| 14 | Nuclei     | sp2? | Experimenta | Isomer 1 | Isomer 2    | Isomer 3 | Isomer 4      | Isomer 5 |
| 15 | C          | x    | 172.64      | 171.8    | 174.7       |          |               |          |
| 16 | C          | x    | 156.19      | 159.1    | 157.2       |          |               |          |
| 17 | C          | x    | 125         | 120.5    | 120.9       |          |               |          |
| 18 | C          | x    | 172.43      | 172.6    | 170.7       |          |               |          |
| 19 | C          |      | 58.67       | 62.6     | 64.9        |          |               |          |
| 20 | C          |      | 62.49       | 59.6     | 60.9        |          |               |          |
| 21 | C          |      | 26.05       | 39.0     | 34.3        |          |               |          |
| 22 | C          |      | 20.88       | 21.4     | 17.4        |          |               |          |
| 23 | C          |      | 20.88       | 13.3     | 19.1        |          |               |          |
| 24 | C          |      | 67.26       | 69.2     | 67.9        |          |               |          |
| 25 | C          |      | 20.93       | 14.4     | 15.53       |          |               |          |

|    | A                | B | C        | D        | E           | F        | G             | H        |
|----|------------------|---|----------|----------|-------------|----------|---------------|----------|
| 1  | Functional       |   | Solvent? |          | Basis Set   |          | Type of Data  |          |
| 2  | B3LYP            |   | PCM      |          | 6-31+G(d,p) |          | Scaled Shifts |          |
| 3  |                  |   |          |          |             |          |               |          |
| 4  |                  |   | Isomer 1 | Isomer 2 | Isomer 3    | Isomer 4 | Isomer 5      | Isomer 6 |
| 5  | sDP4+ (H data)   |   | —        | —        | —           | —        | —             | —        |
| 6  | sDP4+ (C data)   |   | 0.12%    | 99.88%   | —           | —        | —             | —        |
| 7  | sDP4+ (all data) |   | 0.12%    | 99.88%   | —           | —        | —             | —        |
| 8  | uDP4+ (H data)   |   | —        | —        | —           | —        | —             | —        |
| 9  | uDP4+ (C data)   |   | —        | —        | —           | —        | —             | —        |
| 10 | uDP4+ (all data) |   | —        | —        | —           | —        | —             | —        |
| 11 | DP4+ (H data)    |   | —        | —        | —           | —        | —             | —        |
| 12 | DP4+ (C data)    |   | —        | —        | —           | —        | —             | —        |
| 13 | DP4+ (all data)  |   | —        | —        | —           | —        | —             | —        |

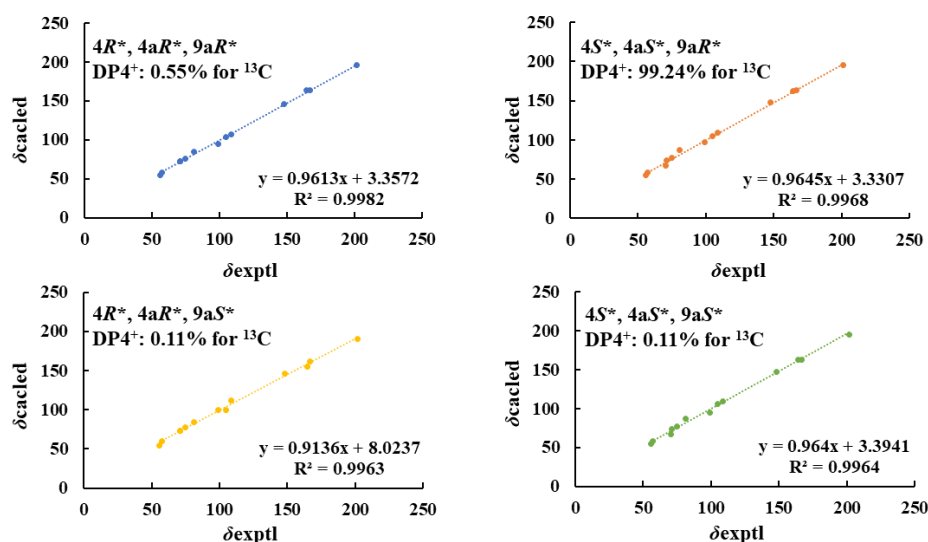

Figure S27. Linear correlation plots of calculated-experimental  $^{13}\text{C}$  NMR chemical shift values with DP4+ analyses for potential configurations of compound 3.

Table S3. DP4<sup>+</sup> analysis of experimental and calculated NMR chemical shifts of Isomer 1: (4R\*, 4aR\*, 9aR\*)-3, Isomer 2: (4S\*, 4aS\*, 9aR\*)-3, Isomer 3: (4R\*, 4aR\*, 9aS\*)-3, and Isomer 4: (4S\*, 4aS\*, 9aS\*)-3.

|    | A          | B    | C            | D        | E            | F        | G             | H        |
|----|------------|------|--------------|----------|--------------|----------|---------------|----------|
| 1  | Functional |      | Solvent?     |          | Basis Set    |          | Type of Data  |          |
| 2  | B3LYP      |      | PCM          |          | 6-31+G(d, p) |          | Scaled Shifts |          |
| 3  |            |      |              |          |              |          |               |          |
| 12 |            |      | DP4+         | –        | –            | –        | –             | –        |
| 14 | Nuclei     | sp2? | Experimental | Isomer 1 | Isomer 2     | Isomer 3 | Isomer 4      | Isomer 5 |
| 15 | C          | x    | 99.22        | 97.0     | 95.2         | 99.8     | 95.2          |          |
| 16 | C          | x    | 166.81       | 165.7    | 167.3        | 168.4    | 165.7         |          |
| 17 | C          | x    | 105.02       | 104.7    | 104.0        | 100.3    | 106.7         |          |
| 18 | C          | x    | 147.9        | 150.3    | 147.8        | 150.8    | 149.8         |          |
| 19 | C          | x    | 108.87       | 110.1    | 108.0        | 113.4    | 109.6         |          |
| 20 | C          | x    | 164.42       | 165.3    | 166.8        | 161.0    | 166.0         |          |
| 21 | C          |      | 71           | 73.2     | 71.6         | 71.6     | 73.1          |          |
| 22 | C          |      | 81.01        | 86.6     | 84.8         | 83.8     | 86.6          |          |
| 23 | C          |      | 57.34        | 56.7     | 57.3         | 57.1     | 57.1          |          |
| 24 | C          | x    | 201.5        | 199.6    | 200.3        | 200.1    | 199.5         |          |
| 25 | C          |      | 74.8         | 76.2     | 75.56        | 75.7     | 76.2          |          |
| 26 | C          |      | 70.71        | 65.81    | 72.31        | 71.50    | 65.85         |          |
| 27 | C          |      | 55.84        | 53.15    | 53.47        | 51.11    | 53.20         |          |

|    | A                | B | C                                                                                         | D                                                                                          | E                                                                                         | F                                                                                         | G             | H        |
|----|------------------|---|-------------------------------------------------------------------------------------------|--------------------------------------------------------------------------------------------|-------------------------------------------------------------------------------------------|-------------------------------------------------------------------------------------------|---------------|----------|
| 1  | Functional       |   | Solvent?                                                                                  |                                                                                            | Basis Set                                                                                 |                                                                                           | Type of Data  |          |
| 2  | B3LYP            |   | PCM                                                                                       |                                                                                            | 6-31+G(d, p)                                                                              |                                                                                           | Scaled Shifts |          |
| 3  |                  |   |                                                                                           |                                                                                            |                                                                                           |                                                                                           |               |          |
| 4  |                  |   | Isomer 1                                                                                  | Isomer 2                                                                                   | Isomer 3                                                                                  | Isomer 4                                                                                  | Isomer 5      | Isomer 6 |
| 5  | sDP4+ (H data)   |   | –                                                                                         | –                                                                                          | –                                                                                         | –                                                                                         | –             | –        |
| 6  | sDP4+ (C data)   |   |  0.55% |  99.24% |  0.11% |  0.11% | –             | –        |
| 7  | sDP4+ (all data) |   |  0.55% |  99.24% |  0.11% |  0.11% | –             | –        |
| 8  | uDP4+ (H data)   |   | –                                                                                         | –                                                                                          | –                                                                                         | –                                                                                         | –             | –        |
| 9  | uDP4+ (C data)   |   | –                                                                                         | –                                                                                          | –                                                                                         | –                                                                                         | –             | –        |
| 10 | uDP4+ (all data) |   | –                                                                                         | –                                                                                          | –                                                                                         | –                                                                                         | –             | –        |
| 11 | DP4+ (H data)    |   | –                                                                                         | –                                                                                          | –                                                                                         | –                                                                                         | –             | –        |
| 12 | DP4+ (C data)    |   | –                                                                                         | –                                                                                          | –                                                                                         | –                                                                                         | –             | –        |
| 13 | DP4+ (all data)  |   | –                                                                                         | –                                                                                          | –                                                                                         | –                                                                                         | –             | –        |

The physicochemical data of compounds 1–18.

(±)-vochysiamide C (1): colourless oil;  $[\alpha]_D^{25}$  0.0 (*c* 0.1, MeOH); UV (MeOH)  $\lambda_{\max}$  (log  $\epsilon$ ): 223 (3.94), 278 (1.71) nm; IR (film)  $\nu_{\max}$  2968, 2363, 1701, 1636, 1398, 1018, 1013, 698, 528 cm<sup>-1</sup>; <sup>1</sup>H NMR (700 MHz, DMSO-*d*<sub>6</sub>)  $\delta_H$  6.53 (d, *J* = 1.6 Hz, 1H, H-3), 4.79 (t, *J* = 5.8 Hz, 1H, OH), 3.99 (tt, *J* = 8.7, 5.8 Hz, 1H, H-7), 3.63 (m, 2H, H-9), 3.56 (dt, *J* = 11.3, 5.8 Hz, 2H, H-8), 2.71 (m, 1H, H-10), 1.15 (d, *J* = 6.8 Hz, 6H, H-11, 12); <sup>13</sup>C NMR (175 MHz, DMSO-*d*<sub>6</sub>)  $\delta_C$  171.4 (C-5), 171.2 (C-2), 154.4 (C-4), 124.9 (C-3), 58.3 (C-8, 9), 56.0 (C-7), 25.1 (C-10), 20.6 (C-11, 12). HRESIMS *m/z* 214.1077 [M+H]<sup>+</sup> (calcd for C<sub>10</sub>H<sub>16</sub>NO<sub>4</sub>, 214.1074).

(+)-vochysiamide B (2): brown oil;  $[\alpha]_D^{25}$  12.38 (*c* 0.1, MeOH); UV (MeOH)  $\lambda_{\max}$  (log  $\epsilon$ ): 211 (3.01), 222 (3.12) nm; ECD (0.3 mg/mL, MeOH)  $\lambda_{\max}$  ( $\Delta \epsilon$ ): 209 (+0.12), 221 (–1.20), 228 (+0.93); IR (film)  $\nu_{\max}$  3347, 2943, 2835, 1701, 1659, 1449, 1429, 1117, 1020, 668, 573 cm<sup>-1</sup>; <sup>1</sup>H NMR (500 MHz, CDCl<sub>3</sub>)  $\delta_H$  6.30 (d, *J* = 1.6 Hz, 1H, H-3), 4.24 (p, *J* = 6.2 Hz, 1H, H-9), 4.07 (m, 1H, H-7), 3.97 (dd, *J* = 12.1, 6.2 Hz, 1H, H-8b), 3.91 (dd, *J* = 12.1, 4.3 Hz, 1H, H-8a), 2.85 (m, 1H, H-11), 1.24 (d, *J* = 6.9 Hz, 6H, H-12, 13), 1.19 (d, *J* = 6.4 Hz, 3H, H-10); <sup>13</sup>C NMR (125 MHz, CDCl<sub>3</sub>)  $\delta_C$

172.6 (C-5), 172.4 (C-2), 156.2 (C-4), 125.0 (C-3), 67.2 (C-9), 62.4 (C-8), 58.7 (C-7), 26.1 (C-11), 20.9 (C-10, 12, 13). HRESIMS  $m/z$  228.1233  $[M+H]^+$  (calcd for  $C_{11}H_{18}NO_4$ , 228.1233).

4S, 3aS, 9aR-3a,9a-deoxy-3a hydroxy-1-dehydroxyarthrinone (3): brown oil;  $[\alpha]_D^{25}$  -26.40 (c 0.1, MeOH); UV (MeOH)  $\lambda_{max}$  (log  $\epsilon$ ): 215 (3.09), 252 (2.22), 286 (2.94), 320 (2.61) nm; ECD (0.3 mg/mL, MeOH)  $\lambda_{max}$  ( $\Delta \epsilon$ ): 212 (+19.10), 240 (-4.98), 252 (-0.63), 285 (-13.39), 308 (+5.97); IR (film)  $\nu_{max}$  2968, 2363, 1701, 1636, 1398, 1501, 1051, 1012, 669, 525  $cm^{-1}$ ;  $^1H$  NMR (500 MHz, DMSO- $d_6$ )  $\delta_H$  12.77 (s, 1H, OH-8), 6.73 (dd,  $J$  = 2.5, 1.3 Hz, 1H, H-5), 6.41 (d,  $J$  = 2.5 Hz, 1H, H-7), 6.13 (s, 1H, OH-4), 5.61 (s, 1H, OH-4a), 4.95 (s, 1H, H-4), 4.20 (dd,  $J$  = 8.0, 1.5 Hz, 1H, H-1a), 4.12 (dd,  $J$  = 8.0, 5.9 Hz, 1H, H-1b), 3.84 (s, 3H, H-10), 3.68 (d,  $J$  = 9.7 Hz, 1H, H-3a), 3.54 (d,  $J$  = 9.7 Hz, 1H, H-3b), 3.04 (dd,  $J$  = 5.8, 1.5 Hz, 1H, H-9a);  $^{13}C$  NMR (125 MHz, DMSO- $d_6$ )  $\delta_C$  201.5 (C-9), 166.8 (C-6), 164.4 (C-8), 147.9 (C-5a), 108.8 (C-8a), 105.0 (C-5), 99.2 (C-7), 81.0 (C-4a), 74.8 (C-3), 71.0 (C-4), 70.7 (C-1), 57.3 (C-9a), 55.8 (C-10). HRESIMS  $m/z$  265.0720  $[M-H]^-$  (calcd for  $C_{13}H_{13}O_6$ , 265.0718).

2, 3, 6, 8-tetrahydroxy-1-methylxanthone (4): pale green solid;  $^1H$  NMR (500 MHz, DMSO- $d_6$ )  $\delta_H$  13.62 (s, 1H, H-8), 6.70 (s, 1H, H-4), 6.24 (d,  $J$  = 2.1 Hz, 1H, H-5), 6.09 (d,  $J$  = 2.0 Hz, 1H, H-7), 2.66 (s, 3H, H-11);  $^{13}C$  NMR (125 MHz, DMSO- $d_6$ )  $\delta_C$  181.8 (C-9), 164.2 (C-6), 162.9 (C-8), 156.5 (C-10a), 153.2 (C-4a), 152.0 (C-3), 141.2 (C-2), 123.9 (C-1), 110.3 (C-1a), 102.2 (C-9a), 99.8 (C-4), 97.5 (C-7), 92.8 (C-5), 13.7 (C-11).

(+)-griseofulvin (5): colourless oil;  $[\alpha]_D^{25}$  153.00 (c 0.1, MeOH);  $^1H$  NMR (500 MHz, DMSO- $d_6$ )  $\delta_H$  6.50 (s, 1H, H-5), 5.60 (s, 1H, H-3'), 4.05 (s, 3H, H-5), 3.94 (s, 3H, H-6), 3.63 (s, 3H, H-2'), 2.83 (m, 2H, H-5'), 2.35 (dd,  $J$  = 16.6, 4.8 Hz, 1H, H-6'), 0.80 (d,  $J$  = 6.6 Hz, 3H, H-7);  $^{13}C$  NMR (125 MHz, DMSO- $d_6$ )  $\delta_C$  195.6 (C-4'), 191.2 (C-3), 170.3 (C-2'), 168.6 (C-7a), 164.5 (C-6), 157.6 (C-4), 104.7 (C-3a), 104.0 (C-3'), 95.2 (C-7), 91.3 (C-1'), 90.1 (C-5), 57.6 (C-4), 57.1 (C-2'), 56.6 (C-6), 39.8 (C-5'), 35.5 (C-6'), 13.8 (C-6).

(R)-(-)-5-hydroxymethylmellein (6): yellow oil;  $[\alpha]_D^{25}$  -8.97 (c 0.1, MeOH);  $^1H$  NMR (500 MHz, DMSO- $d_6$ )  $\delta_H$  11.01 (s, 1H, OH-9), 7.54 (d,  $J$  = 8.5 Hz, 1H, H-5), 6.86 (d,  $J$  = 8.5 Hz, 1H, H-4), 4.75 (m, 1H, H-8), 3.15 (m, 1H, H-7a), 2.80 (m, 1H, H-7b), 1.45 (d,  $J$  = 6.3 Hz, 3H, H-10);  $^{13}C$  NMR (125 MHz, DMSO- $d_6$ )  $\delta_C$  169.7 (C-2), 160.1 (C-3), 138.2 (C-6a), 136.0 (C-5), 129.7 (C-6), 114.7 (C-4), 108.0 (C-2a), 75.5 (C-8), 60.0 (C-9), 30.2 (C-7), 20.4 (C-10).

Bungein A (7): brown solid;  $^1H$  NMR (500 MHz, DMSO- $d_6$ )  $\delta_H$  9.11 (s, 2H, OH), 6.98 (d,  $J$  = 8.4 Hz, 4H, H-2, 6, 2', 6'), 6.65 (d,  $J$  = 8.4 Hz, 4H, H-3, 5, 3', 5'), 3.51 (dt,  $J$  = 7.2, 3.7 Hz, 4H, H-8, 8'), 2.59 (t,  $J$  = 7.3 Hz, 4H, H-7, 7');  $^{13}C$  NMR (175 MHz, DMSO- $d_6$ )  $\delta_C$  155.5 (C-1, 1'), 129.7 (C-4, 4'), 129.5 (C-3, 5, 3', 5'), 114.9 (C-2, 6, 2', 6'), 62.6 (C-8, 8'), 38.3 (C-7, 7').

3-ethylpyrazine-2,5-dipropanoic acid (8): yellow solid;  $^1H$  NMR (500 MHz, DMSO- $d_6$ )  $\delta_H$  8.26 (s, 1H, H-6), 2.99 (t,  $J$  = 7.0 Hz, 2H, H-10), 2.93 (t,  $J$  = 7.3 Hz, 2H, H-3), 2.79 (q,  $J$  = 7.5 Hz, 2H, H-13), 2.69 (d,  $J$  = 7.0 Hz, 1H, H-2), 2.65 (d,  $J$  = 7.4 Hz, 1H, H-11), 1.21 (t,  $J$  = 7.5 Hz, 3H, H-14);  $^{13}C$  NMR (125 MHz, DMSO- $d_6$ )  $\delta_C$  174.0 (C-1), 173.7 (C-12), 154.6 (C-6), 151.7 (C-4), 150.3 (C-7), 140.0 (C-9), 32.3 (C-2), 31.0 (C-11a), 29.1 (C-3), 27.6 (C-10), 26.5 (C-13), 12.0 (C-14).

(S)-4-hydroxy-2,3-dimethyl-4-pentyl- $\gamma$ -lactone (9): colourless oil;  $[\alpha]_D^{25}$  -3.90 (c 0.1, MeOH);  $^1H$  NMR (500 MHz, DMSO- $d_6$ )  $\delta_H$  7.11 (s, 1H, OH), 1.86 (d,  $J$  = 1.3 Hz, 3H, H-11), 1.86 (m, 1H, H-6a), 1.80 (m, 1H, H-6b), 1.70 (d,  $J$  = 1.4 Hz, 3H, H-12), 1.30 (m, 1H, H-7a), 1.22 (m, 4H, H-8, 9), 1.12 (m, H-7b), 0.83 (t,  $J$  = 6.8 Hz, 3H, H-10);  $^{13}C$  NMR (125 MHz, DMSO- $d_6$ )  $\delta_C$  172.1 (C-2), 159.0 (C-4), 124.0 (C-3), 107.8 (C-5), 36.1 (C-6), 31.5 (C-7), 22.8 (C-8), 22.4 (C-9), 14.4 (C-10), 11.1 (C-11), 8.6 (C-12).

(R)-2-hydroxy-3-phenylpropanoic acid (10): brown oil;  $[\alpha]_D^{25}$  3.27 (c 0.1, MeOH);  $^1\text{H}$  NMR (500 MHz, DMSO- $d_6$ )  $\delta_{\text{H}}$  7.20 (m, 5H, H-5, 6, 7, 8, 9), 4.24 (ddd,  $J$  = 8.1, 6.1, 4.9 Hz, 1H, H-2), 3.60 (s, 3H, H-10), 2.94 (dd,  $J$  = 13.7, 5.0 Hz, 1H, H-3a), 2.81 (dd,  $J$  = 13.7, 8.2 Hz, 1H, H-3b);  $^{13}\text{C}$  NMR (175 MHz, DMSO- $d_6$ )  $\delta_{\text{C}}$  173.9 (C-1), 137.7 (C-4), 129.3 (C-6, 8), 128.0 (C-4, 5), 126.2 (C-7), 71.2 (C-2), 51.4 (C-10), 40.1 (C-3).

1-phenylbutane-2,3-diol (11): brown oil;  $[\alpha]_D^{25}$  -1.83 (c 0.1, MeOH);  $^1\text{H}$  NMR (500 MHz, DMSO- $d_6$ )  $\delta_{\text{H}}$  7.26 (m, 2H, H-3, 5), 7.23 (m, 2H, H-2, 6), 7.16 (m, 1H, H-1), 4.40 (m, 2H, OH-8, 9), 3.50 (m, 1H, H-9), 3.38 (m, 1H, H-8), 2.77 (dd,  $J$  = 13.6, 3.8 Hz, 1H, H-7a), 2.49 (m, 1H, H-7b), 1.06 (d,  $J$  = 6.3 Hz, 3H);  $^{13}\text{C}$  NMR (125 MHz, DMSO- $d_6$ )  $\delta_{\text{C}}$  140.4 (C-4), 129.3 (C-3, 5), 127.9 (C-2, 6), 125.5 (C-1), 75.5 (C-8), 68.6 (C-9), 38.3 (C-7), 18.7 (C-10).

*p*-hydroxybenzaldehyde (12): purple grey solid;  $^1\text{H}$  NMR (500 MHz, DMSO- $d_6$ )  $\delta_{\text{H}}$  9.80 (s, 1H, H-1), 7.77 (d,  $J$  = 8.6 Hz, 2H, H-2, 6), 6.94 (d,  $J$  = 8.6 Hz, 2H, H-3, 5);  $^{13}\text{C}$  NMR (125 MHz, DMSO- $d_6$ )  $\delta_{\text{C}}$  190.9 (C-1), 163.4 (C-5), 132.1 (C-2), 128.4 (C-3, 7), 115.9 (C-4, 6).

4-methoxyphenylacetic acid (13): colourless oil;  $^1\text{H}$  NMR (700 MHz, DMSO- $d_6$ )  $\delta_{\text{H}}$  7.03 (d,  $J$  = 8.5 Hz, 2H, H-2, 6), 6.69 (d,  $J$  = 8.4 Hz, 2H, H-3, 5), 3.59 (s, 3H, H-9), 3.52 (s, 2H, H-7);  $^{13}\text{C}$  NMR (175 MHz, DMSO- $d_6$ )  $\delta_{\text{C}}$  172.1 (C-8), 156.3 (C-4), 130.3 (C-1), 124.4 (C-2, 6), 115.1 (C-3, 5), 51.6 (C-9), 39.9 (C-7).

4-hydroxyacetophenone (14): white solid;  $^1\text{H}$  NMR (700 MHz, DMSO- $d_6$ )  $\delta_{\text{H}}$  7.82 (d,  $J$  = 8.7 Hz, 2H, H-4, 6), 6.83 (d,  $J$  = 8.7 Hz, 2H, H-3, 7), 2.47 (s, 3H, H-8);  $^{13}\text{C}$  NMR (175 MHz, DMSO- $d_6$ )  $\delta_{\text{C}}$  196.0 (COCH<sub>3</sub>), 162.3 (C-2), 130.7 (C-4, 6), 128.4 (C-5), 115.2 (C-3, 7), 26.3 (C-8).

4-hydroxy phenethyl acetate (15): colourless oil;  $^1\text{H}$  NMR (500 MHz, DMSO- $d_6$ )  $\delta_{\text{H}}$  9.21 (s, 1H, OH), 7.02 (d,  $J$  = 8.4 Hz, 2H, H-2, 6), 6.68 (d,  $J$  = 8.4 Hz, 2H, H-3, 5), 4.12 (t,  $J$  = 7.1 Hz, 2H, H-8), 2.75 (t,  $J$  = 7.1 Hz, 2H, H-7), 1.97 (s, 3H, H-10);  $^{13}\text{C}$  NMR (125 MHz, DMSO- $d_6$ )  $\delta_{\text{C}}$  170.3 (C-9), 155.9 (C-4), 129.7 (C-2, 6), 127.8 (C-1), 115.2 (C-3, 5), 64.7 (C-8), 33.5 (C-7), 20.7 (C-10).

Methyl 2-hydroxy-3-(4'-hydroxy)-phenyl propionate (16): brown oil;  $[\alpha]_D^{25}$  0.40 (c 0.1, MeOH);  $^1\text{H}$  NMR (700 MHz, DMSO- $d_6$ )  $\delta_{\text{H}}$  9.17 (s, 1H, OH-7), 6.97 (d,  $J$  = 8.4 Hz, 2H, H-5, 9), 6.64 (d,  $J$  = 8.4 Hz, 2H, H-6, 8), 5.47 (d,  $J$  = 6.2 Hz, 1H, OH-2), 4.14 (dt,  $J$  = 7.8, 5.5 Hz, 1H, H-2), 3.59 (s, 3H, H-10), 2.81 (dd,  $J$  = 13.8, 5.2 Hz, 1H, H-3a), 2.70 (dd,  $J$  = 13.8, 7.9 Hz, 1H, H-3b);  $^{13}\text{C}$  NMR (175 MHz, DMSO- $d_6$ )  $\delta_{\text{C}}$  174.03 (C-1), 155.8 (C-7), 130.2 (C-5, 9), 127.6 (C-4), 114.8 (C-6, 8), 71.6 (C-2), 51.3 (C-10), 40.0 (C-3).

Protocatechoic acid (17):  $^1\text{H}$  NMR (500 MHz, DMSO- $d_6$ )  $\delta_{\text{H}}$  7.33 (s, 1H, H-2), 7.28 (d,  $J$  = 7.8 Hz, 1H, H-6), 6.77 (d,  $J$  = 8.2 Hz, 1H, H-5);  $^{13}\text{C}$  NMR (125 MHz, DMSO- $d_6$ )  $\delta_{\text{C}}$  167.3 (C-1), 150.0 (C-5), 144.9 (C-4), 121.9 (C-7), 121.7 (C-2), 116.6 (C-3), 115.1 (C-6).

Apocynin (18): white solid;  $^1\text{H}$  NMR (500 MHz, DMSO- $d_6$ )  $\delta_{\text{H}}$  7.50 (dd,  $J$  = 8.3, 2.0 Hz, 1H, H-7), 7.43 (d,  $J$  = 2.0 Hz, 1H, H-3), 6.86 (d,  $J$  = 8.2 Hz, 1H, H-4), 3.82 (s, 3H, H-9), 2.48 (s, 3H, H-8);  $^{13}\text{C}$  NMR (125 MHz, DMSO- $d_6$ )  $\delta_{\text{C}}$  196.06 (C-1), 151.8 (C-5), 147.5 (C-4), 128.8 (C-2), 123.4 (C-7), 114.9 (C-6), 111.1 (C-3), 55.6 (C-9), 26.2 (C-8).
